# Supplementary material
Source: PubMed Central journal article supplement (PMC5520171)
Supplement: cdd201763x1.pdf [file cdd201763x1.pdf]

## Supplementary Materials

### **MicroRNA-30a attenuates mutant KRAS-driven colorectal tumorigenesis via direct suppression of ME1**

Hongxing Shen<sup>1,2</sup>, Chuan Xing<sup>1,2</sup>, Kaisa Cui<sup>1,2</sup>, Yunxiao Li<sup>1,2</sup>, Jinxiang Zhang<sup>3</sup>, Runlei Du<sup>1</sup>, Xiaodong Zhang<sup>1</sup> and Youjun Li<sup>1,2\*</sup>

<sup>1</sup>*Hubei Key Laboratory of Cell Homeostasis, College of Life Sciences, Wuhan University, Wuhan, China, 430072*

<sup>2</sup>*Medical Research Institute, School of Medicine, Wuhan University, Wuhan, China, 430071*

<sup>3</sup>*Department of Surgery, Wuhan Union Hospital, Wuhan, China, 430022*

\*Correspondence: Youjun Li, Hubei Key Laboratory of Cell Homeostasis, College of Life Sciences, Medical Research Institute, Wuhan University, Wuhan 430072, China; Email: liy7@whu.edu.cn; Phone: 86-27-68752050; Fax: 86-27-68752560

#### **Supplementary Materials includes:**

11 Supplementary Figures and 3 Supplementary Tables.

## Supplementary Figures

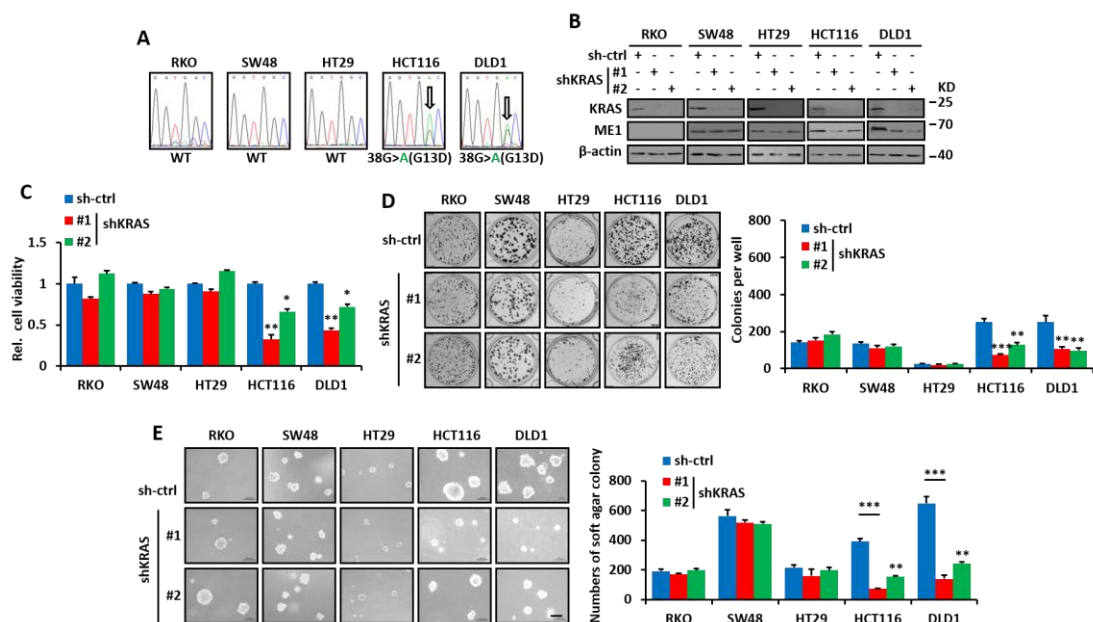

### Supplementary Figure S1 (Related to Figure 1) KRAS dependency in CRC cells.

**A**, Validation of KRAS-mutant status in CRC (RKO, SW48, HT29, HCT116 and DLD1) cells by genomic DNA sequencing. **B**, KRAS suppression was detected by Immunoblot. β-actin was used as the loading control. **C-E**, KRAS suppression attenuated cell viability (**C**), focus formation (**D**) and anchorage-independent soft agar growth (**E**) in HCT116 and DLD1 cells. Scale bar, 200 μm. Colonies of focus formation and anchorage-independent soft agar were counted and showed in bar graphs. Data are shown as the means ± SD. \*P < 0.05, \*\*P < 0.01, \*\*\*P < 0.001.

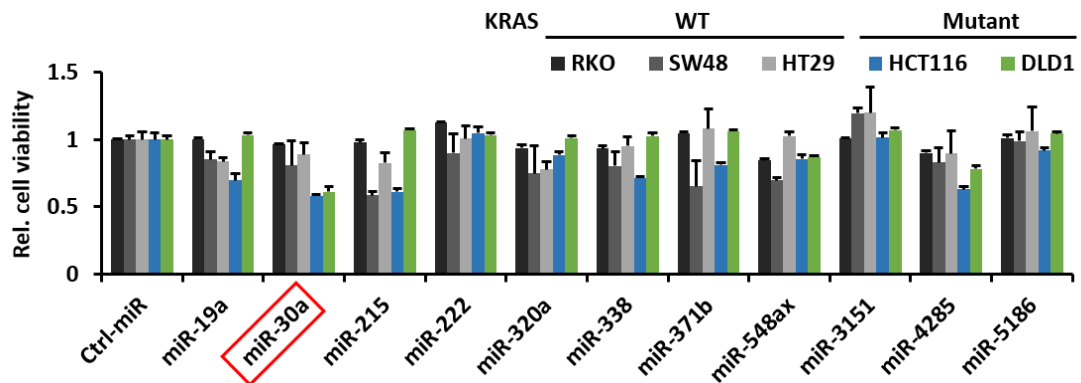

**Supplementary Figure S2 (Related to Figure 1)** The effects of 11 miRNA candidates on growth in KRAS WT CRC cells (RKO, SW48 and HT29) and KRAS-mutant CRC cells (HCT116 and DLD1). miR-30a overexpression significantly inhibited cell growth in KRAS-mutant CRC cells.

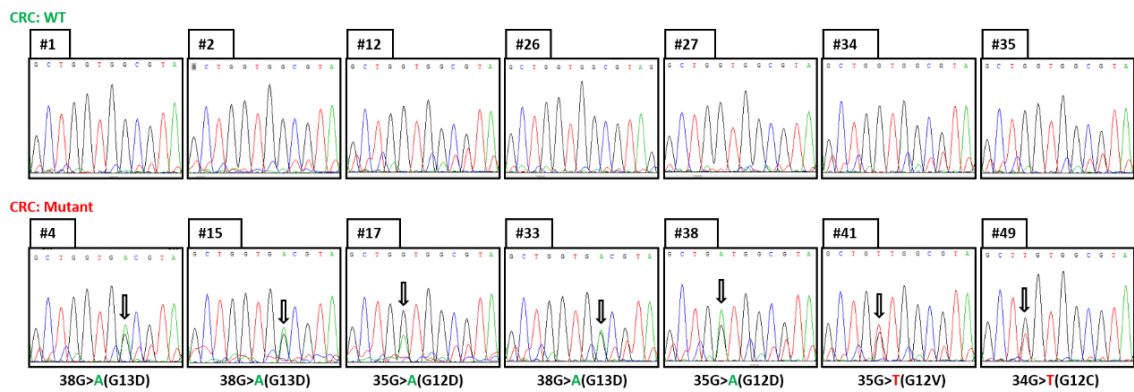

**Supplementary Figure S3 (Related to Figure 1)** Genomic DNA sequencing of 14 CRC tissues. The first exon of KRAS, which contains the most prevalent mutation, was amplified by PCR and sequenced. The upper 7 CRC tissues were identified as KRAS WT and the lower 7 CRC tissues were identified as KRAS-mutant.

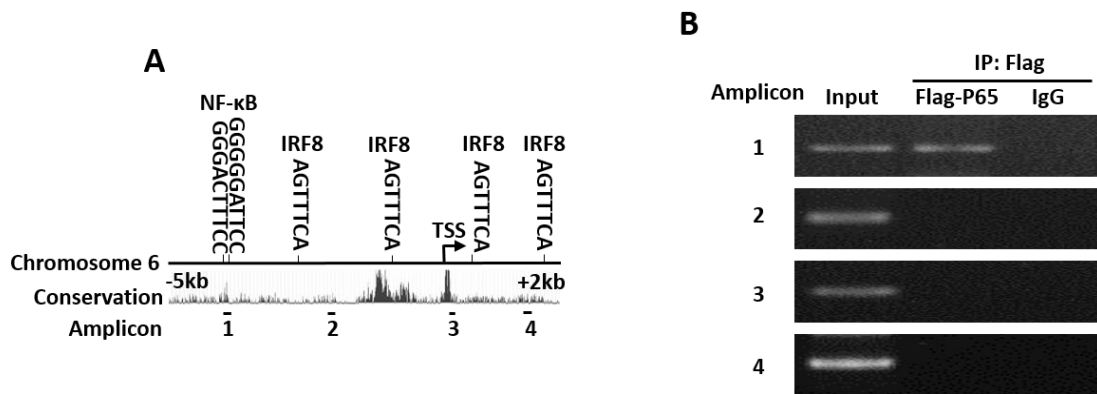

**Supplementary Figure S4 (Related to Figure 1) P65 binds to the miR-30a promoter region. A,** Schematic representation of predicted transcription factors modulating miR-30a expression. Four amplicons for ChIP assay were showed. **B,** ChIP assay showed direct binding of P65 at the first amplicon of the miR-30a promoter in HEK-293 cells overexpressing P65.

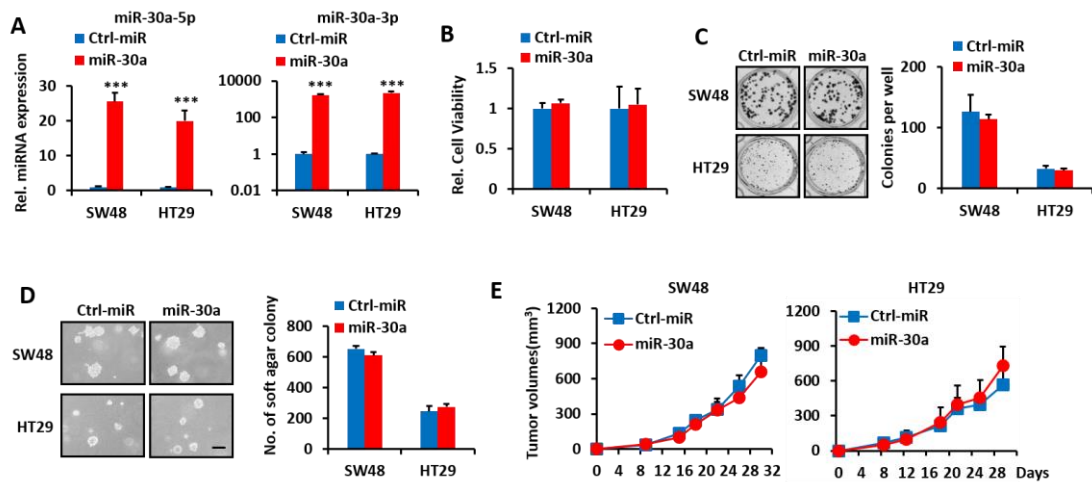

**Supplementary Figure S5 (Related to Figure 2) Effects of miR-30a**

**overexpression on KRAS WT SW48 and HT29 cells. A, Expression levels of miR-30a-5p/3p were measured in SW48 and HT29 cells with miR-30a overexpression.**

**B, Cell growth of miR-30a-overexpressing SW48 and HT29 cells was measured by**

**MTT assays. C, Focus formation assay of cells from A. Colonies were counted and**

**showed in bar graph. D, Anchorage-independent soft agar growth assays of cells from**

**A. Scale bar, 200  $\mu$ m. Colonies were counted and photographed after incubation at**

**37 ° for 14 days. E, Tumor growth in SW48 and HT29 xenografts. Data are shown as**

**the means  $\pm$  SD. \*\*\*P < 0.001.**

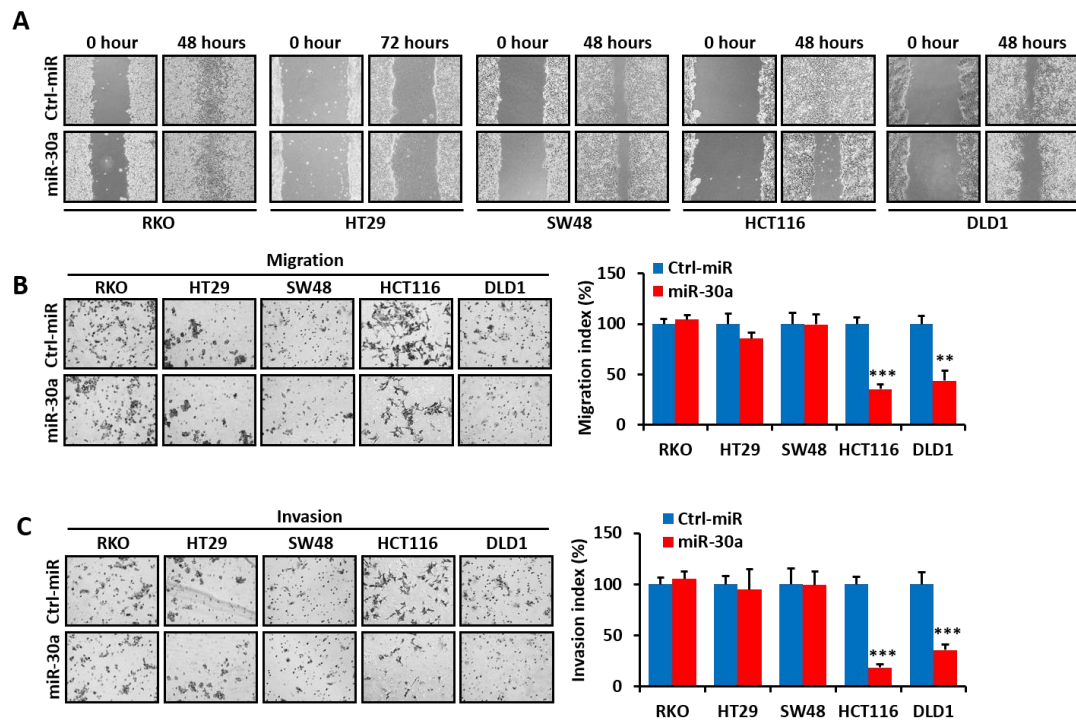

**Supplementary Figure S6 (Related to Figure 2) miR-30a overexpression significantly inhibits wound-healing closure, cell migration and invasion of KRAS-mutant CRC cells.** **A**, Migration rates of miR-30a overexpressing CRC cells were detected by wound-healing assays. Closure of the wound was photographed over 48 or 72 hours after the wound was made. Representative images are shown (100 $\times$ ). **B**,  $2 \times 10^5$  indicated Cells were seeded in transwell chambers with PET track-etched membranes and incubated for 24 hours. Migrated cells were stained and photographed (200  $\times$ ). Migration index was determined by counting migrated cells in 8 randomly selected microscopic fields per well and compared with control, which was set as 100%. **C**, As for invasion assay, indicated cells were seeded in the matrigel-coated invasion chambers. Invasive index was measured as the same as migration index. Data are shown as the means  $\pm$  SD. \*\*P < 0.01, \*\*\*P < 0.001.

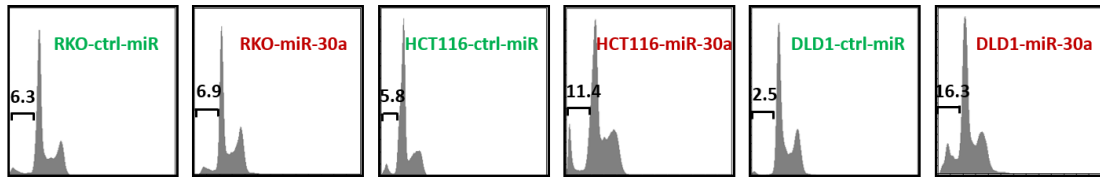

**Supplementary Figure S7 (Related to Figure 2)** Apoptosis was quantified after propidium iodide staining by measuring the Sub-G1 DNA content by flow cytometry analysis in miR-30a-overexpressing CRC cells.



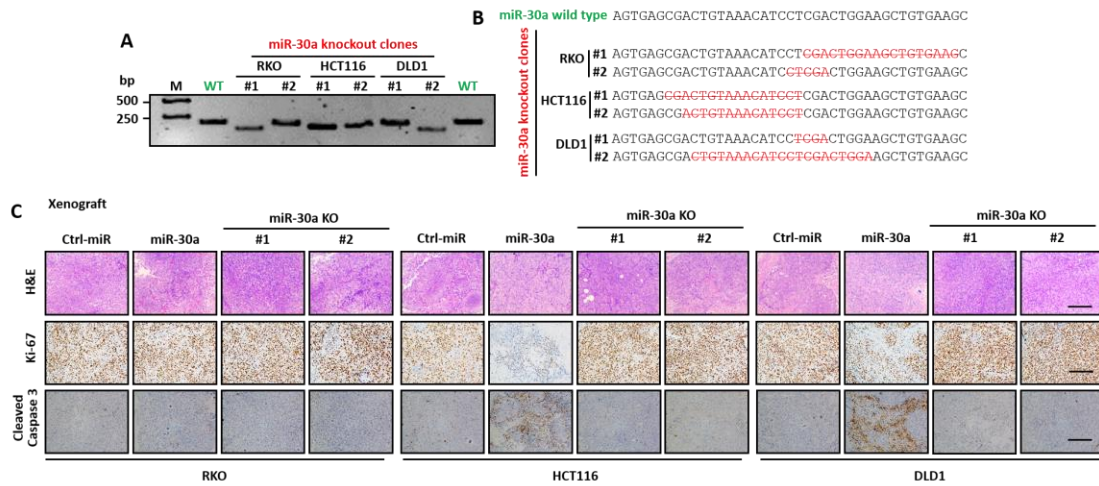

**Supplementary Figure S8 (Related to Figure 2) Identification of miR-30a knockout clones.** **A**, miR-30a knockout clones carry distinct PCR products of different lengths compared with parent cells. **B**, DNA sequences for each PCR product. Deleted sequences are shown in red strikethrough. **C**, Xenografts in nude mice from Figure 2f were analyzed by IHC. Representative images of H&E, Ki-67 and cleaved Caspase-3 staining were showed. Scale bar, 200  $\mu$ m.

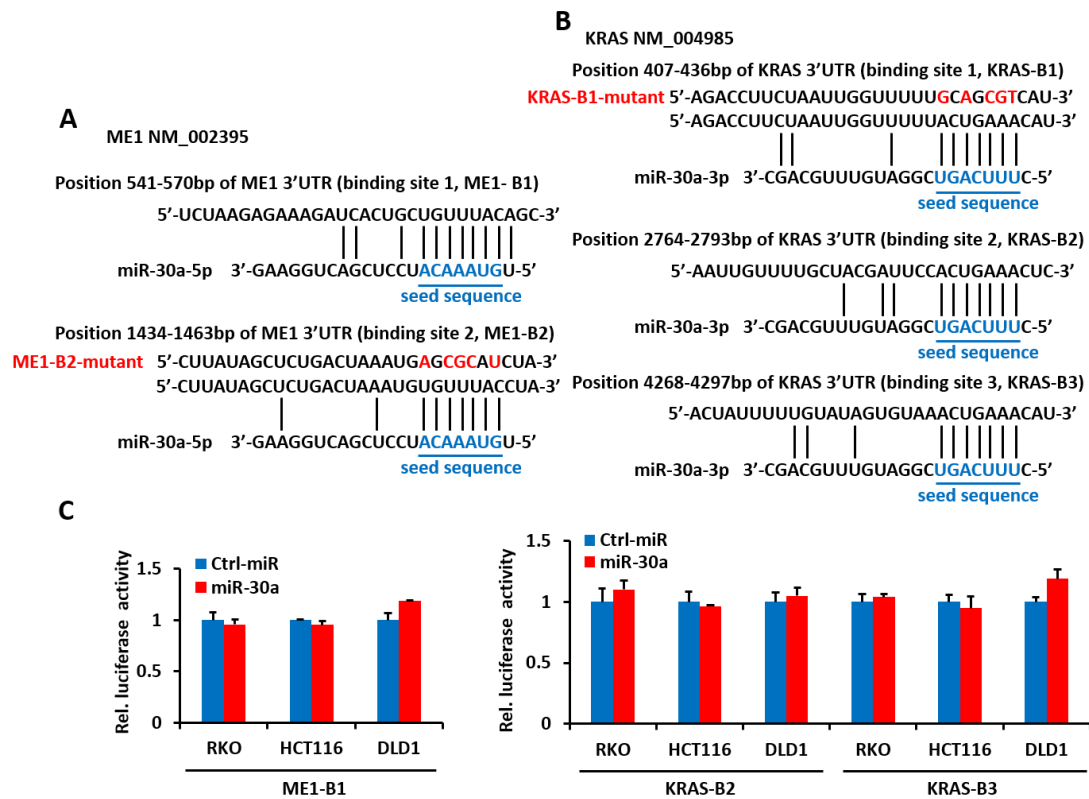

**Supplementary Figure S9 (Related to Figure 3) miR-30a inhibits ME1 and KRAS.** A-B, Predicted binding sites of miR-30a in KRAS and ME1 3'UTR were shown in detailed base pairing. Mutations in the KRAS and ME1 3'UTR were shown in red. C, miR-30a-overexpressing CRC cells were transfected with reporter vector containing predicted miR-30a binding site (ME1-B1, KRAS-B2 and KRAS-B3) and luciferase reporter assay was performed.

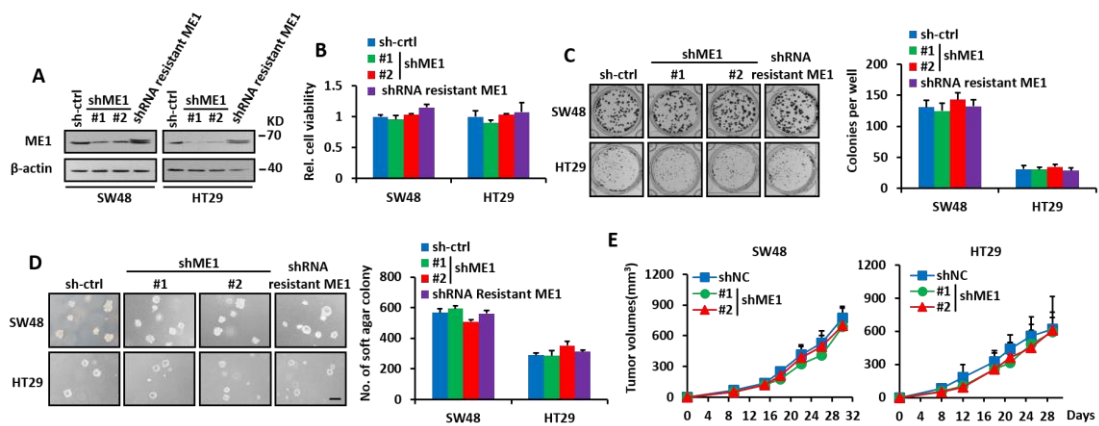

**Supplementary Figure S10 (Related to Figure 5) Effects of ME1 suppression on KRAS WT CRC (SW48 and HT29) cell growth and tumorigenicity. A, Inhibition of ME1 was confirmed by immunoblot. ME1 protein levels was rescued by overexpressing shME1-resistant ME1.  $\beta$ -actin was used as the loading control. B, Cell growth of indicated cells were measured by MTT assays. Bar graph shows the relative cell viability against control. C, Focus formation assay of cells from A. Colonies were counted and showed in bar graph. D, Anchorage-independent soft agar growth assays of cells from A. Scale bar, 200  $\mu$ m. Colonies were counted and photographed after incubation at 37 ° for 14 days. E, Tumor growth in SW48 and HT29 xenograft. Data are shown as the means  $\pm$ SD.**

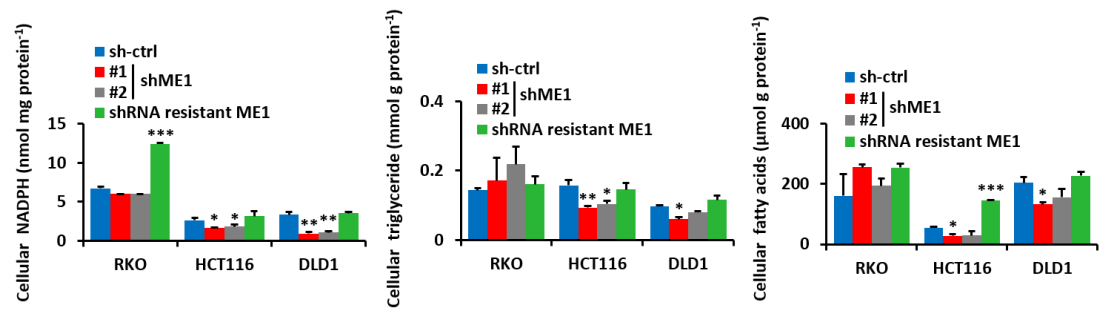

**Supplementary Figure S11 (Related to Figure 5)** Cellular NADPH, triglyceride and fatty acids were detected in CRC cells stably expressing control shRNA, ME1 shRNA-#1, ME1 shRNA-#2 or ME1 shRNA-#1+shME1-resistant ME1. Data are shown as the means  $\pm$ SD. \*P < 0.05, \*\*P < 0.01.

## Supplementary Tables

**Supplementary Table 1. High-content screening results in HCT116 cells using miRNA library.**

| No. | miRNA         | Log <sub>2</sub> (OD570 <sub>miRNA</sub> /OD570 <sub>Ctrl-miR</sub> ) |          |
|-----|---------------|-----------------------------------------------------------------------|----------|
|     |               | HCT116 (G13D)                                                         | RKO (WT) |
| 1   | hsa-let-7a-1  | -0.2607                                                               | -0.0462  |
| 2   | hsa-let-7a-2  | -0.2544                                                               | -0.6079  |
| 3   | hsa-let-7a-3  | -0.1184                                                               | -0.0302  |
| 4   | hsa-let-7b    | -0.213                                                                | 0.1791   |
| 5   | hsa-let-7c    | -0.6892                                                               | -0.6307  |
| 6   | hsa-let-7d    | -0.2108                                                               | 0.0502   |
| 7   | hsa-let-7e    | -0.331                                                                | -0.1384  |
| 8   | hsa-let-7f-1  | -0.1954                                                               | -0.0761  |
| 9   | hsa-let-7f-2  | -0.6341                                                               | -0.7175  |
| 10  | hsa-let-7g    | 0.1492                                                                | -0.1087  |
| 11  | hsa-let-7i    | -0.0847                                                               | -0.5708  |
| 12  | hsa-mir-1-1   | 0.0288                                                                | -0.0443  |
| 13  | hsa-mir-1-2   | -0.1153                                                               | -0.1345  |
| 14  | hsa-mir-7-1   | 0.1936                                                                | -0.054   |
| 15  | hsa-mir-7-2   | -0.0351                                                               | 0.0314   |
| 16  | hsa-mir-7-3   | -0.2895                                                               | 0.1327   |
| 17  | hsa-mir-9-1   | -0.1377                                                               | -0.0973  |
| 18  | hsa-mir-9-2   | 0.1714                                                                | -0.0213  |
| 19  | hsa-mir-9-3   | 0.0981                                                                | 0.1619   |
| 20  | hsa-mir-10a   | 0.0326                                                                | -0.0062  |
| 21  | hsa-mir-10b   | -0.2442                                                               | 0.0339   |
| 22  | hsa-mir-15a   | 0.1324                                                                | 0.0759   |
| 23  | hsa-mir-15b   | -0.0405                                                               | -0.0475  |
| 24  | hsa-mir-16-1  | -0.2976                                                               | 0.0472   |
| 25  | hsa-mir-16-2  | 0.1608                                                                | -0.0213  |
| 26  | hsa-mir-17    | 0.0932                                                                | 0.2876   |
| 27  | hsa-mir-18a   | -0.2982                                                               | -0.0226  |
| 28  | hsa-mir-18b   | 0.1748                                                                | 0.1287   |
| 29  | hsa-mir-19a   | -0.711                                                                | -0.054   |
| 30  | hsa-mir-19b-1 | -0.2533                                                               | 0.1608   |
| 31  | hsa-mir-19b-2 | 0.1586                                                                | 0.0454   |
| 32  | hsa-mir-20a   | -0.0162                                                               | 0.4064   |
| 33  | hsa-mir-20b   | -0.3458                                                               | -0.1087  |

---

|    |                |         |         |
|----|----------------|---------|---------|
| 34 | hsa-mir-21     | -0.0104 | -0.0469 |
| 35 | hsa-mir-22     | -0.5827 | 0.0526  |
| 36 | hsa-mir-23a    | 0.2683  | 0.1005  |
| 37 | hsa-mir-23b    | -0.1992 | -0.0469 |
| 38 | hsa-mir-23c    | -0.0797 | 0.0363  |
| 39 | hsa-mir-24-1   | 0.1857  | 0.0729  |
| 40 | hsa-mir-24-2   | -0.4428 | -0.0598 |
| 41 | hsa-mir-25     | 0.0409  | -0.0482 |
| 42 | hsa-mir-26a-1  | 0.1488  | 0.0056  |
| 43 | hsa-mir-26a-2  | 0.2286  | 0.0717  |
| 44 | hsa-mir-26b    | -0.1684 | 0.1132  |
| 45 | hsa-mir-27a    | -0.1992 | 0.0037  |
| 46 | hsa-mir-27b    | -0.4893 | 0.1017  |
| 47 | hsa-mir-28     | 0.001   | 0.0929  |
| 48 | hsa-mir-29a    | -0.4956 | -0.0169 |
| 49 | hsa-mir-29b-1  | 0.0381  | -0.0762 |
| 50 | hsa-mir-29b-2  | 0.0025  | -0.2289 |
| 51 | hsa-mir-29c    | -0.3863 | -0.4674 |
| 52 | hsa-mir-30a    | -0.7788 | -0.0599 |
| 53 | hsa-mir-30b    | 0.1411  | 0.0313  |
| 54 | hsa-mir-30c-1  | 0.1561  | -0.0045 |
| 55 | hsa-mir-30c-2  | 0.2122  | 0.0077  |
| 56 | hsa-mir-30d    | 0.0892  | -0.0359 |
| 57 | hsa-mir-30e    | 0.0086  | -0.1437 |
| 58 | hsa-mir-31     | -0.0622 | -0.1016 |
| 59 | hsa-mir-32     | -0.0028 | -0.0293 |
| 60 | hsa-mir-33a    | 0.0067  | -0.2711 |
| 61 | hsa-mir-33b    | -0.5806 | -0.0974 |
| 62 | hsa-mir-34a    | -0.598  | -0.5654 |
| 63 | hsa-mir-34b    | -0.3249 | -0.4652 |
| 64 | hsa-mir-34c    | -0.617  | -0.6405 |
| 65 | hsa-mir-92a-1  | 0.0919  | -0.0701 |
| 66 | hsa-mir-92a-2  | 0.1101  | -0.0647 |
| 67 | hsa-mir-93     | 0.04    | -0.0871 |
| 68 | hsa-mir-95     | 0.2887  | -0.3211 |
| 69 | hsa-mir-96     | 0.2914  | -0.0995 |
| 70 | hsa-mir-98     | 0.0666  | 0.0103  |
| 71 | hsa-mir-99a    | 0.1836  | 0.073   |
| 72 | hsa-mir-99b    | 0.091   | 0.0243  |
| 73 | hsa-mir-100    | -0.0186 | -0.105  |
| 74 | hsa-mir-101-1  | 0.2411  | -0.1057 |
| 75 | hsa-mir-101-2  | 0.0488  | -0.1043 |
| 76 | hsa-mir-103a-1 | 0.3347  | -0.2372 |
| 77 | hsa-mir-103a-2 | 0.0566  | -0.0293 |

---

---

|     |                |         |         |
|-----|----------------|---------|---------|
| 78  | hsa-mir-103b-1 | -0.0244 | -0.0864 |
| 79  | hsa-mir-103b-2 | 0.298   | -0.0104 |
| 80  | hsa-mir-105-1  | 0.2403  | -0.0065 |
| 81  | hsa-mir-105-2  | 0.1127  | -0.0823 |
| 82  | hsa-mir-106a   | 0.0914  | -0.1113 |
| 83  | hsa-mir-106b   | 0.1501  | -0.0526 |
| 84  | hsa-mir-107    | 0.1911  | -0.0687 |
| 85  | hsa-mir-122    | 0.2163  | 0.0064  |
| 86  | hsa-mir-124-1  | 0.337   | -0.3173 |
| 87  | hsa-mir-124-2  | 0.103   | -0.0326 |
| 88  | hsa-mir-125a   | -0.1657 | 0.0791  |
| 89  | hsa-mir-125b-1 | 0.1065  | -0.0694 |
| 90  | hsa-mir-125b-2 | 0.1311  | 0.0488  |
| 91  | hsa-mir-126    | 0.2663  | -0.0701 |
| 92  | hsa-mir-127    | 0.2298  | -0.0313 |
| 93  | hsa-mir-128-1  | 0.2261  | -0.0599 |
| 94  | hsa-mir-128-2  | 0.1096  | -0.0601 |
| 95  | hsa-mir-129-1  | 0.1765  | -0.1481 |
| 96  | hsa-mir-129-2  | -0.6035 | -0.5379 |
| 97  | hsa-mir-130a   | -0.0749 | -0.1028 |
| 98  | hsa-mir-130b   | -0.2963 | -0.1843 |
| 99  | hsa-mir-133a-1 | 0.0576  | -0.1059 |
| 100 | hsa-mir-133a-2 | 0.1404  | -0.1278 |
| 101 | hsa-mir-133b   | -0.2605 | -0.1341 |
| 102 | hsa-mir-134    | 0.2656  | -0.1668 |
| 103 | hsa-mir-135a-1 | 0.2758  | -0.2242 |
| 104 | hsa-mir-135a-2 | 0.2855  | -0.183  |
| 105 | hsa-mir-135b   | 0.6018  | 0.5531  |
| 106 | hsa-mir-136    | -0.3103 | -0.259  |
| 107 | hsa-mir-137    | 0.1862  | -0.1481 |
| 108 | hsa-mir-138-1  | -0.196  | -0.1791 |
| 109 | hsa-mir-138-2  | -0.159  | -0.1202 |
| 110 | hsa-mir-139    | -0.0355 | -0.1936 |
| 111 | hsa-mir-140    | 0.0704  | -0.119  |
| 112 | hsa-mir-141    | -0.552  | -0.2022 |
| 113 | hsa-mir-142    | 0.1103  | -0.2611 |
| 114 | hsa-mir-143    | -0.8058 | -0.6193 |
| 115 | hsa-mir-144    | -0.0126 | -0.2162 |
| 116 | hsa-mir-145    | -0.1758 | -0.1539 |
| 117 | hsa-mir-146a   | 0.0936  | -0.1481 |
| 118 | hsa-mir-146b   | 0.1179  | -0.2549 |
| 119 | hsa-mir-147a   | 0.263   | -0.3103 |
| 120 | hsa-mir-147b   | -0.1991 | -0.2289 |
| 121 | hsa-mir-148a   | -0.7219 | -0.6619 |

---

---

|     |                |         |         |
|-----|----------------|---------|---------|
| 122 | hsa-mir-148b   | -0.4654 | -0.3635 |
| 123 | hsa-mir-150    | 0.0581  | -0.1857 |
| 124 | hsa-mir-151a   | 0.1543  | -0.2229 |
| 125 | hsa-mir-151b   | 0.2161  | -0.0433 |
| 126 | hsa-mir-152    | -0.0424 | -0.1084 |
| 127 | hsa-mir-153-1  | 0.2201  | -0.2115 |
| 128 | hsa-mir-153-2  | -0.3859 | -0.2514 |
| 129 | hsa-mir-154    | 0.0645  | -0.2701 |
| 130 | hsa-mir-155    | -0.3109 | -0.2918 |
| 131 | hsa-mir-181a-1 | -0.0033 | -0.2115 |
| 132 | hsa-mir-181a-2 | -0.1205 | -0.3162 |
| 133 | hsa-mir-181b-1 | 0.3593  | -0.0595 |
| 134 | hsa-mir-181b-2 | 0.1409  | -0.0746 |
| 135 | hsa-mir-181c   | 0.0373  | -0.114  |
| 136 | hsa-mir-181d   | -0.8088 | -0.6218 |
| 137 | hsa-mir-182    | 0.0946  | -0.0837 |
| 138 | hsa-mir-183    | 0.1184  | -0.185  |
| 139 | hsa-mir-184    | 0.0615  | -0.0619 |
| 140 | hsa-mir-185    | 0.3593  | -0.2015 |
| 141 | hsa-mir-186    | 0.3485  | 0.057   |
| 142 | hsa-mir-187    | -0.1429 | -0.0026 |
| 143 | hsa-mir-188    | 0.1311  | -0.0038 |
| 144 | hsa-mir-190a   | 0.0105  | 0.0083  |
| 145 | hsa-mir-190b   | 0.2668  | -0.0135 |
| 146 | hsa-mir-191    | -0.248  | -0.3095 |
| 147 | hsa-mir-192    | 0.0378  | -0.1485 |
| 148 | hsa-mir-193a   | 0.3314  | -0.0553 |
| 149 | hsa-mir-193b   | 0.2249  | -0.095  |
| 150 | hsa-mir-194-1  | 0.2205  | -0.1989 |
| 151 | hsa-mir-194-2  | 0.0541  | -0.1591 |
| 152 | hsa-mir-195    | 0.1885  | -0.2218 |
| 153 | hsa-mir-196a-1 | -0.0695 | -0.2771 |
| 154 | hsa-mir-196a-2 | -0.3217 | -0.2756 |
| 155 | hsa-mir-196b   | 0.1217  | -0.1295 |
| 156 | hsa-mir-197    | 0.3525  | -0.0493 |
| 157 | hsa-mir-198    | 0.1222  | -0.0375 |
| 158 | hsa-mir-199a-1 | 0.1858  | -0.0553 |
| 159 | hsa-mir-199a-2 | 0.0146  | -0.185  |
| 160 | hsa-mir-199b   | -0.2317 | -0.0774 |
| 161 | hsa-mir-200a   | 0.0156  | -0.4527 |
| 162 | hsa-mir-200b   | -0.1492 | -0.1046 |
| 163 | hsa-mir-200c   | 0.0507  | -0.0653 |
| 164 | hsa-mir-202    | 0.3014  | 0.0146  |
| 165 | hsa-mir-203    | 0.1676  | -0.0277 |

---



---

|     |                |         |          |
|-----|----------------|---------|----------|
| 166 | hsa-mir-204    | 0.0782  | -0.009   |
| 167 | hsa-mir-205    | -0.2627 | -0.1435  |
| 168 | hsa-mir-206    | -0.3119 | -0.193   |
| 169 | hsa-mir-208a   | -0.6515 | -0.6235  |
| 170 | hsa-mir-208b   | 0.1122  | -0.1114  |
| 171 | hsa-mir-210    | 0.1612  | -0.0895  |
| 172 | hsa-mir-211    | 0.0176  | 0.0582   |
| 173 | hsa-mir-212    | -0.1855 | -0.0507  |
| 174 | hsa-mir-214    | -0.2001 | -0.018   |
| 175 | hsa-mir-215    | -0.6841 | -0.0984  |
| 176 | hsa-mir-216a   | -0.1492 | -0.1211  |
| 177 | hsa-mir-216b   | -0.089  | -0.5587  |
| 178 | hsa-mir-217    | 0.0893  | -0.0507  |
| 179 | hsa-mir-218-1  | 0.0747  | -0.0193  |
| 180 | hsa-mir-218-2  | 0.3055  | -0.0135  |
| 181 | hsa-mir-219-1  | -0.2131 | 0.0903   |
| 182 | hsa-mir-219-2  | 0.3379  | 0.1017   |
| 183 | hsa-mir-221    | 0.1539  | 0.0303   |
| 184 | hsa-mir-222    | -0.6564 | 0.0915   |
| 185 | hsa-mir-223    | -0.0519 | -0.0045  |
| 186 | hsa-mir-224    | 0.2306  | 0.1017   |
| 187 | hsa-mir-296    | 0.2467  | 0.0867   |
| 188 | hsa-mir-297    | 0.2779  | -0.068   |
| 189 | hsa-mir-298    | 0.2796  | -0.1471  |
| 190 | hsa-mir-299    | 0.2804  | -0.217   |
| 191 | hsa-mir-300    | 0.2846  | -0.2157  |
| 192 | hsa-mir-301b   | -0.2957 | -0.2157  |
| 193 | hsa-mir-302a   | 0.0193  | -0.0878  |
| 194 | hsa-mir-302b   | -0.0105 | -0.1341  |
| 195 | hsa-mir-302d   | -0.1435 | -0.076   |
| 196 | hsa-mir-302e   | 0.3083  | -0.1733  |
| 197 | hsa-mir-302f   | -0.7635 | -0.7614  |
| 198 | hsa-mir-320a   | -0.6188 | -0.1066  |
| 199 | hsa-mir-320b-1 | -0.167  | -0.2572  |
| 200 | hsa-mir-320b-2 | -0.533  | -0.2978  |
| 201 | hsa-mir-320c-1 | 0.204   | -0.2034  |
| 202 | hsa-mir-320c-2 | -0.0944 | -0.1953  |
| 203 | hsa-mir-320d-2 | -0.1371 | -0.1111  |
| 204 | hsa-mir-323a   | 0.0229  | -0.267   |
| 205 | hsa-mir-323b   | -0.1835 | -0.17    |
| 206 | hsa-mir-324    | -0.2696 | -0.365   |
| 207 | hsa-mir-325    | -0.402  | -0.2075  |
| 208 | hsa-mir-326    | -0.6357 | -0.72763 |
| 209 | hsa-mir-328    | 0.2197  | -0.1906  |

---

---

|     |                |         |         |
|-----|----------------|---------|---------|
| 210 | hsa-mir-329-1  | 0.1366  | -0.1213 |
| 211 | hsa-mir-329-2  | 0.4258  | 0.0598  |
| 212 | hsa-mir-330    | 0.1393  | -0.1568 |
| 213 | hsa-mir-335    | -0.3068 | -0.1399 |
| 214 | hsa-mir-337    | -0.3982 | -0.1123 |
| 215 | hsa-mir-338    | -0.6233 | -0.0741 |
| 216 | hsa-mir-339    | -0.2461 | -0.2095 |
| 217 | hsa-mir-342    | 0.1051  | -0.1041 |
| 218 | hsa-mir-345    | 0.2153  | -0.0243 |
| 219 | hsa-mir-346    | 0.334   | 0.2442  |
| 220 | hsa-mir-361    | 0.5594  | 0.0694  |
| 221 | hsa-mir-362    | 0.2172  | -0.0997 |
| 222 | hsa-mir-363    | 0.3603  | -0.1003 |
| 223 | hsa-mir-365a   | 0.0757  | -0.0047 |
| 224 | hsa-mir-365b   | -0.3343 | -0.2614 |
| 225 | hsa-mir-367    | -0.1851 | -0.0249 |
| 226 | hsa-mir-369    | -0.053  | -0.0569 |
| 227 | hsa-mir-370    | -0.4088 | -0.0249 |
| 228 | hsa-mir-371a   | 0.066   | -0.0171 |
| 229 | hsa-mir-371b   | -0.6267 | -0.0285 |
| 230 | hsa-mir-372    | -0.4059 | -0.0692 |
| 231 | hsa-mir-373    | -0.1922 | -0.0834 |
| 232 | hsa-mir-374a   | -0.402  | -0.0735 |
| 233 | hsa-mir-374b   | 0.0569  | 0.1663  |
| 234 | hsa-mir-374c   | 0.1919  | -0.0006 |
| 235 | hsa-mir-375    | 0.2122  | -0.0785 |
| 236 | hsa-mir-376a-1 | -0.0999 | -0.202  |
| 237 | hsa-mir-376b   | 0.4117  | 0.133   |
| 238 | hsa-mir-376c   | 0.122   | -0.2827 |
| 239 | hsa-mir-377    | 0.3369  | -0.0889 |
| 240 | hsa-mir-378a   | 0.0611  | -0.1645 |
| 241 | hsa-mir-378b   | 0.2507  | -0.4406 |
| 242 | hsa-mir-378c   | 0.1031  | -0.4142 |
| 243 | hsa-mir-378d-1 | 0.5555  | 0.0438  |
| 244 | hsa-mir-378d-2 | -0.0598 | -0.1507 |
| 245 | hsa-mir-378e   | -0.0936 | -0.1926 |
| 246 | hsa-mir-378f   | -0.2001 | -0.189  |
| 247 | hsa-mir-378g   | -0.4263 | -0.168  |
| 248 | hsa-mir-378h   | -0.1752 | -0.1902 |
| 249 | hsa-mir-378i   | 0.1393  | -0.1039 |
| 250 | hsa-mir-379    | 0.1011  | -0.1879 |
| 251 | hsa-mir-380    | 0.159   | -0.0922 |
| 252 | hsa-mir-381    | 0.2241  | -0.1341 |
| 253 | hsa-mir-382    | 0.122   | -0.0972 |

---

---

|     |                |         |         |
|-----|----------------|---------|---------|
| 254 | hsa-mir-383    | 0.0221  | -0.0967 |
| 255 | hsa-mir-384    | -0.2953 | -0.1217 |
| 256 | hsa-mir-409    | 0.0513  | -0.1686 |
| 257 | hsa-mir-410    | -0.0728 | -0.1144 |
| 258 | hsa-mir-411    | 0.1386  | -0.0994 |
| 259 | hsa-mir-412    | 0.3654  | -0.0851 |
| 260 | hsa-mir-421    | -0.0991 | -0.1524 |
| 261 | hsa-mir-422a   | -0.5617 | -0.1622 |
| 262 | hsa-mir-423    | -0.0759 | -0.1738 |
| 263 | hsa-mir-425    | 0.3671  | -0.2128 |
| 264 | hsa-mir-429    | -0.2908 | -0.2633 |
| 265 | hsa-mir-431    | 0.0527  | -0.1319 |
| 266 | hsa-mir-432    | 0.379   | -0.2086 |
| 267 | hsa-mir-433    | 0.3705  | 0.1505  |
| 268 | hsa-mir-448    | 0.2852  | -0.0972 |
| 269 | hsa-mir-449a   | 0.2786  | -0.1697 |
| 270 | hsa-mir-449b   | -0.0216 | -0.2062 |
| 271 | hsa-mir-449c   | -0.3659 | -0.1541 |
| 272 | hsa-mir-450a-2 | -0.5801 | -0.2375 |
| 273 | hsa-mir-451a   | 0.2531  | -0.1161 |
| 274 | hsa-mir-451b   | 0.1386  | -0.0596 |
| 275 | hsa-mir-452    | 0.0513  | -0.0666 |
| 276 | hsa-mir-454    | -0.0216 | -0.0731 |
| 277 | hsa-mir-466    | 0.0874  | -0.1381 |
| 278 | hsa-mir-484    | 0.0279  | -0.1902 |
| 279 | hsa-mir-485    | -0.2882 | -0.1849 |
| 280 | hsa-mir-486    | -0.0843 | -0.11   |
| 281 | hsa-mir-487a   | 0.1446  | -0.0661 |
| 282 | hsa-mir-487b   | 0.3089  | -0.1223 |
| 283 | hsa-mir-488    | 0.5874  | -0.0056 |
| 284 | hsa-mir-489    | 0.0004  | 0.0978  |
| 285 | hsa-mir-490    | 0.1505  | -0.0123 |
| 286 | hsa-mir-491    | -0.1156 | 0.0346  |
| 287 | hsa-mir-492    | -0.3352 | 0.2673  |
| 288 | hsa-mir-493    | -0.5162 | -0.0045 |
| 289 | hsa-mir-494    | -0.0416 | -0.1152 |
| 290 | hsa-mir-495    | -0.1215 | 0.0599  |
| 291 | hsa-mir-496    | -0.1351 | 0.0481  |
| 292 | hsa-mir-497    | -0.0122 | -0.1811 |
| 293 | hsa-mir-498    | 0.0531  | -0.1635 |
| 294 | hsa-mir-499a   | -0.0796 | -0.0978 |
| 295 | hsa-mir-499b   | -0.1061 | -0.2403 |
| 296 | hsa-mir-500a   | -0.0914 | -0.066  |
| 297 | hsa-mir-500b   | -0.0063 | -0.1456 |

---

---

|     |                 |         |         |
|-----|-----------------|---------|---------|
| 298 | hsa-mir-501     | -0.0637 | 0.0083  |
| 299 | hsa-mir-502     | 0.0723  | -0.0567 |
| 300 | hsa-mir-503     | -0.1028 | -0.0637 |
| 301 | hsa-mir-504     | -0.0876 | -0.093  |
| 302 | hsa-mir-505     | -0.0439 | -0.0492 |
| 303 | hsa-mir-506     | -0.2917 | 0.1982  |
| 304 | hsa-mir-507     | -0.1828 | 0.0508  |
| 305 | hsa-mir-508     | -0.0023 | -0.0498 |
| 306 | hsa-mir-509-1   | 0.0228  | 0.0444  |
| 307 | hsa-mir-510     | 0.0355  | 0.2327  |
| 308 | hsa-mir-511-1   | -0.018  | 0.0324  |
| 309 | hsa-mir-512-1   | -0.09   | -0.0326 |
| 310 | hsa-mir-513a-1  | 0.0017  | -0.0498 |
| 311 | hsa-mir-513b    | -0.0956 | 0.0111  |
| 312 | hsa-mir-513c    | -0.1434 | 0.0994  |
| 313 | hsa-mir-514a-1  | 0.0048  | -0.0463 |
| 314 | hsa-mir-514b    | 0.0659  | 0.1205  |
| 315 | hsa-mir-518c    | -0.0782 | 0       |
| 316 | hsa-mir-521-2   | 0.0604  | 0.0199  |
| 317 | hsa-mir-526a-2  | -0.0175 | -0.0241 |
| 318 | hsa-mir-532     | 0.1282  | -0.0378 |
| 319 | hsa-mir-539     | 0.0924  | 0       |
| 320 | hsa-mir-541     | -0.2351 | 0.2327  |
| 321 | hsa-mir-542     | -0.0466 | 0.1082  |
| 322 | hsa-mir-543     | 0.0372  | 0.103   |
| 323 | hsa-mir-544b    | 0.0241  | 0.2289  |
| 324 | hsa-mir-548a-1  | -0.5645 | 0.1312  |
| 325 | hsa-mir-548a-2  | 0.087   | 0.1251  |
| 326 | hsa-mir-548a-3  | 0.1069  | 0.0848  |
| 327 | hsa-mir-548aa-1 | 0.1011  | 0.0952  |
| 328 | hsa-mir-548aa-2 | -0.2378 | 0.1777  |
| 329 | hsa-mir-548ac   | 0.0411  | 0.1564  |
| 330 | hsa-mir-548ad   | -0.0388 | -0.2553 |
| 331 | hsa-mir-548ae-1 | 0.0441  | -0.0778 |
| 332 | hsa-mir-548ag-1 | -0.1356 | -0.1579 |
| 333 | hsa-mir-548ag-2 | 0.1424  | -0.1364 |
| 334 | hsa-mir-548ai   | 0.1392  | -0.1797 |
| 335 | hsa-mir-548aj-1 | 0.1233  | -0.1275 |
| 336 | hsa-mir-548ak   | -0.0623 | -0.0884 |
| 337 | hsa-mir-548al   | 0.0424  | -0.1586 |
| 338 | hsa-mir-548am   | 0.0039  | -0.1726 |
| 339 | hsa-mir-548an   | 0.0591  | -0.1017 |
| 340 | hsa-mir-548ao   | -0.0243 | -0.2434 |
| 341 | hsa-mir-548aq   | 0.0065  | -0.1419 |

---

---

|     |                |         |          |
|-----|----------------|---------|----------|
| 342 | hsa-mir-548ar  | 0.1604  | -0.2471  |
| 343 | hsa-mir-548as  | -0.0407 | -0.0387  |
| 344 | hsa-mir-548at  | -0.1361 | -0.1166  |
| 345 | hsa-mir-548av  | 0.0415  | -0.0666  |
| 346 | hsa-mir-548aw  | -0.0735 | -0.2353  |
| 347 | hsa-mir-548ax  | -0.6113 | -0.11307 |
| 348 | hsa-mir-548b   | 0.0307  | -0.1846  |
| 349 | hsa-mir-548c   | 0.0857  | -0.1789  |
| 350 | hsa-mir-548d-1 | 0.1094  | -0.1405  |
| 351 | hsa-mir-548d-2 | 0.0727  | -0.0904  |
| 352 | hsa-mir-548e   | -0.1215 | -0.0857  |
| 353 | hsa-mir-548f-1 | 0.0065  | -0.1357  |
| 354 | hsa-mir-548f-2 | 0.1254  | -0.2367  |
| 355 | hsa-mir-548g   | 0.0363  | -0.1384  |
| 356 | hsa-mir-548h-3 | -0.0148 | -0.2221  |
| 357 | hsa-mir-548h-4 | 0.1327  | -0.2177  |
| 358 | hsa-mir-548h-5 | 0.1119  | -0.2257  |
| 359 | hsa-mir-548i-4 | 0.0621  | -0.0503  |
| 360 | hsa-mir-548j   | -0.1662 | -0.0189  |
| 361 | hsa-mir-548k   | 0.0294  | -0.1213  |
| 362 | hsa-mir-548l   | 0.1444  | -0.1761  |
| 363 | hsa-mir-548m   | 0.0999  | -0.1818  |
| 364 | hsa-mir-548o   | -0.0279 | -0.2434  |
| 365 | hsa-mir-548p   | 0.1217  | -0.1882  |
| 366 | hsa-mir-548q   | 0.1388  | -0.1684  |
| 367 | hsa-mir-548s   | 0.1032  | -0.1474  |
| 368 | hsa-mir-548t   | -0.0288 | -0.0672  |
| 369 | hsa-mir-548v   | 0.0363  | -0.1551  |
| 370 | hsa-mir-548w   | -0.231  | -0.1071  |
| 371 | hsa-mir-548x   | 0.0803  | -0.0464  |
| 372 | hsa-mir-548x-2 | 0.1384  | -0.1064  |
| 373 | hsa-mir-548y   | 0.1307  | -0.0594  |
| 374 | hsa-mir-548z   | 0.1209  | -0.0419  |
| 375 | hsa-mir-549    | 0.0727  | -0.1206  |
| 376 | hsa-mir-550a-1 | -0.0171 | -0.1241  |
| 377 | hsa-mir-551a   | -0.2154 | -0.0421  |
| 378 | hsa-mir-551b   | 0.0501  | 0.0221   |
| 379 | hsa-mir-552    | 0.0638  | -0.1642  |
| 380 | hsa-mir-553    | 0.0672  | -0.1906  |
| 381 | hsa-mir-554    | 0.0651  | -0.3013  |
| 382 | hsa-mir-555    | 0.0398  | -0.0585  |
| 383 | hsa-mir-556    | 0.0359  | -0.0861  |
| 384 | hsa-mir-557    | -0.0361 | 0.0288   |
| 385 | hsa-mir-558    | -0.1322 | -0.0181  |

---

---

|     |             |         |         |
|-----|-------------|---------|---------|
| 386 | hsa-mir-559 | -0.056  | 0.023   |
| 387 | hsa-mir-561 | -0.129  | 0.0224  |
| 388 | hsa-mir-563 | -0.0575 | -0.0943 |
| 389 | hsa-mir-564 | -0.0537 | -0.2515 |
| 390 | hsa-mir-567 | -0.0726 | 0.0071  |
| 391 | hsa-mir-568 | -0.0787 | -0.0861 |
| 392 | hsa-mir-569 | -0.2185 | 0.0341  |
| 393 | hsa-mir-570 | 0.0874  | -0.0193 |
| 394 | hsa-mir-571 | -0.1025 | 0.0612  |
| 395 | hsa-mir-573 | -0.0001 | 0.0474  |
| 396 | hsa-mir-574 | -0.094  | -0.0905 |
| 397 | hsa-mir-575 | 0.1915  | -0.0848 |
| 398 | hsa-mir-576 | 0.1896  | -0.4943 |
| 399 | hsa-mir-577 | -0.0932 | -0.0351 |
| 400 | hsa-mir-578 | -0.2499 | 0.0468  |
| 401 | hsa-mir-579 | -0.4472 | -0.0229 |
| 402 | hsa-mir-582 | -0.0665 | -0.0247 |
| 403 | hsa-mir-583 | 0.071   | 0.0306  |
| 404 | hsa-mir-584 | 0.1407  | -0.0835 |
| 405 | hsa-mir-585 | 0.2755  | -0.0943 |
| 406 | hsa-mir-587 | -0.03   | 0.0094  |
| 407 | hsa-mir-588 | -0.056  | -0.009  |
| 408 | hsa-mir-589 | -0.1723 | 0.0463  |
| 409 | hsa-mir-590 | -0.0695 | 0.0515  |
| 410 | hsa-mir-591 | -0.2516 | -0.0133 |
| 411 | hsa-mir-592 | -0.084  | 0.0142  |
| 412 | hsa-mir-593 | 0.0411  | -0.0437 |
| 413 | hsa-mir-595 | 0.2725  | -0.0412 |
| 414 | hsa-mir-596 | 0.3003  | -0.0127 |
| 415 | hsa-mir-597 | 0.2003  | -0.0572 |
| 416 | hsa-mir-598 | -0.3121 | 0.0956  |
| 417 | hsa-mir-599 | -0.0978 | 0.0714  |
| 418 | hsa-mir-600 | 0.1595  | 0.099   |
| 419 | hsa-mir-601 | 0.1289  | 0.215   |
| 420 | hsa-mir-602 | -0.0153 | 0.0434  |
| 421 | hsa-mir-603 | 0.0334  | -0.088  |
| 422 | hsa-mir-604 | 0.2448  | 0.0549  |
| 423 | hsa-mir-605 | -0.0894 | -0.0007 |
| 424 | hsa-mir-606 | -0.3302 | 0.0587  |
| 425 | hsa-mir-607 | -0.0337 | 0.0396  |
| 426 | hsa-mir-609 | 0.0812  | 0.0353  |
| 427 | hsa-mir-610 | -0.1409 | -0.0263 |
| 428 | hsa-mir-611 | 0.0724  | -0.1423 |
| 429 | hsa-mir-612 | 0.0982  | -0.0057 |

---

---

|     |              |         |         |
|-----|--------------|---------|---------|
| 430 | hsa-mir-613  | 0.0586  | -0.0302 |
| 431 | hsa-mir-614  | 0.1029  | 0.1209  |
| 432 | hsa-mir-616  | 0.0341  | -0.0511 |
| 433 | hsa-mir-617  | 0.0049  | -0.0465 |
| 434 | hsa-mir-618  | 0.0432  | -0.0019 |
| 435 | hsa-mir-619  | 0.2761  | -0.0237 |
| 436 | hsa-mir-620  | 0.1762  | -0.1117 |
| 437 | hsa-mir-621  | 0.2369  | -0.0413 |
| 438 | hsa-mir-623  | 0.2725  | -0.1269 |
| 439 | hsa-mir-624  | 0.0221  | 0.0593  |
| 440 | hsa-mir-625  | -0.2152 | 0.0007  |
| 441 | hsa-mir-626  | -0.0001 | 0.1179  |
| 442 | hsa-mir-627  | 0.2962  | 0.0334  |
| 443 | hsa-mir-628  | 0.2387  | -0.1332 |
| 444 | hsa-mir-629  | 0.2381  | 0.3287  |
| 445 | hsa-mir-630  | 0.1341  | -0.0946 |
| 446 | hsa-mir-631  | 0.1196  | -0.0038 |
| 447 | hsa-mir-632  | -0.0463 | 0.0823  |
| 448 | hsa-mir-633  | -0.4413 | -0.025  |
| 449 | hsa-mir-634  | 0.0013  | -0.0063 |
| 450 | hsa-mir-635  | 0.14    | -0.098  |
| 451 | hsa-mir-636  | 0.1518  | -0.0697 |
| 452 | hsa-mir-638  | 0.1769  | -0.0764 |
| 453 | hsa-mir-639  | -0.0978 | -0.0544 |
| 454 | hsa-mir-640  | 0.1984  | 0.0996  |
| 455 | hsa-mir-641  | 0.1413  | -0.1001 |
| 456 | hsa-mir-642a | -0.38   | 0.0445  |
| 457 | hsa-mir-642b | -0.1032 | -0.0341 |
| 458 | hsa-mir-643  | 0.235   | -0.0899 |
| 459 | hsa-mir-644a | -0.0292 | -0.1297 |
| 460 | hsa-mir-644b | 0.0256  | -0.0791 |
| 461 | hsa-mir-645  | -0.0088 | -0.3892 |
| 462 | hsa-mir-646  | -0.3023 | 0.1238  |
| 463 | hsa-mir-647  | -0.2516 | 0.039   |
| 464 | hsa-mir-648  | -0.4335 | 0.1062  |
| 465 | hsa-mir-650  | -0.238  | 0.0799  |
| 466 | hsa-mir-651  | 0.0833  | -0.0012 |
| 467 | hsa-mir-652  | -0.0008 | -0.0159 |
| 468 | hsa-mir-653  | 0.1737  | -0.0393 |
| 469 | hsa-mir-654  | 0.1123  | -0.069  |
| 470 | hsa-mir-655  | 0.1781  | -0.0488 |
| 471 | hsa-mir-656  | -0.0628 | -0.0588 |
| 472 | hsa-mir-657  | -0.3139 | 0.0427  |
| 473 | hsa-mir-658  | -0.47   | 0.0366  |

---

---

|     |              |         |         |
|-----|--------------|---------|---------|
| 474 | hsa-mir-660  | -0.1204 | 0.0504  |
| 475 | hsa-mir-661  | -0.313  | 0.0536  |
| 476 | hsa-mir-663a | 0.0235  | 0.1209  |
| 477 | hsa-mir-663b | 0.0572  | -0.0038 |
| 478 | hsa-mir-664  | -0.0695 | -0.0868 |
| 479 | hsa-mir-665  | -0.0478 | 0.0149  |
| 480 | hsa-mir-668  | -0.1804 | -0.0677 |
| 481 | hsa-mir-670  | 0.1046  | -0.0916 |
| 482 | hsa-mir-671  | -0.0916 | -0.1502 |
| 483 | hsa-mir-675  | -0.0901 | 0.0678  |
| 484 | hsa-mir-676  | 0.0757  | 0.0672  |
| 485 | hsa-mir-708  | -0.0812 | 0.0002  |
| 486 | hsa-mir-711  | -0.1432 | -0.3814 |
| 487 | hsa-mir-720  | -0.0289 | -0.0564 |
| 488 | hsa-mir-744  | -0.239  | -0.1508 |
| 489 | hsa-mir-758  | 0.3722  | -0.2826 |
| 490 | hsa-mir-759  | 0.0008  | 0.113   |
| 491 | hsa-mir-760  | -0.0361 | 0.003   |
| 492 | hsa-mir-761  | 0.025   | 0.0487  |
| 493 | hsa-mir-764  | -0.0563 | -0.0152 |
| 494 | hsa-mir-765  | 0.1713  | -0.0319 |
| 495 | hsa-mir-766  | -0.0519 | -0.0832 |
| 496 | hsa-mir-767  | -0.0672 | -0.0389 |
| 497 | hsa-mir-769  | 0.2645  | -0.0482 |
| 498 | hsa-mir-770  | 0.0777  | -0.0784 |
| 499 | hsa-mir-802  | -0.5037 | -0.4078 |
| 500 | hsa-mir-874  | 0.1201  | 0.0796  |
| 501 | hsa-mir-875  | -0.0432 | 0.0366  |
| 502 | hsa-mir-876  | -0.1225 | -0.0862 |
| 503 | hsa-mir-877  | -0.1681 | -0.1068 |
| 504 | hsa-mir-885  | -0.1058 | -0.0301 |
| 505 | hsa-mir-887  | 0.1169  | 0.0438  |
| 506 | hsa-mir-888  | 0.0935  | 0.0266  |
| 507 | hsa-mir-889  | 0.0961  | 0.1354  |
| 508 | hsa-mir-890  | 0.0523  | 0.1375  |
| 509 | hsa-mir-891a | 0.0737  | 0.041   |
| 510 | hsa-mir-891b | 0.3199  | -0.1054 |
| 511 | hsa-mir-892a | 0.061   | -0.1623 |
| 512 | hsa-mir-892b | -0.0325 | -0.0548 |
| 513 | hsa-mir-920  | -0.0864 | -0.1706 |
| 514 | hsa-mir-921  | -0.0432 | 0.1166  |
| 515 | hsa-mir-922  | 0.0895  | 0.0755  |
| 516 | hsa-mir-924  | -0.0048 | -0.0154 |
| 517 | hsa-mir-933  | 0.0243  | -0.1061 |

---



---

|     |                |         |         |
|-----|----------------|---------|---------|
| 518 | hsa-mir-934    | 0.0928  | -0.0438 |
| 519 | hsa-mir-935    | 0.0181  | -0.2571 |
| 520 | hsa-mir-936    | -0.1058 | -0.1122 |
| 521 | hsa-mir-937    | -0.0968 | -0.1377 |
| 522 | hsa-mir-938    | -0.0154 | -0.0005 |
| 523 | hsa-mir-939    | 0.1405  | 0.0375  |
| 524 | hsa-mir-940    | 0.0523  | 0.0042  |
| 525 | hsa-mir-942    | 0.0022  | -0.1383 |
| 526 | hsa-mir-943    | 0.0008  | -0.1823 |
| 527 | hsa-mir-944    | 0.1272  | -0.1331 |
| 528 | hsa-mir-1178   | -0.0805 | -0.0653 |
| 529 | hsa-mir-1179   | -0.0361 | -0.1275 |
| 530 | hsa-mir-1180   | 0.0063  | 0.1206  |
| 531 | hsa-mir-1181   | 0.1418  | -0.0653 |
| 532 | hsa-mir-1182   | -0.0555 | -0.0697 |
| 533 | hsa-mir-1183   | 0.0236  | -0.1712 |
| 534 | hsa-mir-1184-1 | 0.0862  | -0.0284 |
| 535 | hsa-mir-1185-1 | 0.145   | -0.0521 |
| 536 | hsa-mir-1193   | -0.2522 | -0.3093 |
| 537 | hsa-mir-1197   | 0.007   | -0.0925 |
| 538 | hsa-mir-1200   | 0.0737  | 0.0503  |
| 539 | hsa-mir-1202   | 0.1386  | 0.2828  |
| 540 | hsa-mir-1203   | 0.1111  | -0.0371 |
| 541 | hsa-mir-1204   | 0.0974  | -0.1828 |
| 542 | hsa-mir-1205   | -0.0055 | -0.1162 |
| 543 | hsa-mir-1206   | 0.0001  | -0.0414 |
| 544 | hsa-mir-1207   | -0.0768 | -0.0516 |
| 545 | hsa-mir-1208   | -0.0197 | -0.091  |
| 546 | hsa-mir-1224   | 0.0697  | 0.1445  |
| 547 | hsa-mir-1225   | 0.0462  | 0.0398  |
| 548 | hsa-mir-1226   | 0.0482  | -0.0132 |
| 549 | hsa-mir-1227   | -0.5146 | -0.1408 |
| 550 | hsa-mir-1228   | -0.1975 | -0.0915 |
| 551 | hsa-mir-1231   | -0.0077 | -0.0038 |
| 552 | hsa-mir-1233-1 | -0.1943 | -0.0265 |
| 553 | hsa-mir-1236   | -0.1187 | -0.0845 |
| 554 | hsa-mir-1237   | -0.0519 | 0.0638  |
| 555 | hsa-mir-1238   | -0.3702 | 0.0412  |
| 556 | hsa-mir-1243   | 0.0236  | -0.0208 |
| 557 | hsa-mir-1244-1 | -0.0105 | 0.0674  |
| 558 | hsa-mir-1245a  | -0.1225 | 0.1702  |
| 559 | hsa-mir-1245b  | 0.0119  | 0.0103  |
| 560 | hsa-mir-1246   | -0.2415 | -0.0633 |
| 561 | hsa-mir-1247   | -0.0211 | -0.2052 |

---

---

|     |                 |         |         |
|-----|-----------------|---------|---------|
| 562 | hsa-mir-1248    | 0.1494  | 0.1622  |
| 563 | hsa-mir-1249    | 0.025   | -0.1091 |
| 564 | hsa-mir-1250    | 0.0195  | -0.1631 |
| 565 | hsa-mir-1251    | -0.0592 | -0.137  |
| 566 | hsa-mir-1252    | -0.0731 | 0.0005  |
| 567 | hsa-mir-1253    | 0.0001  | -0.1081 |
| 568 | hsa-mir-1254-2  | -0.1021 | -0.2384 |
| 569 | hsa-mir-1255a   | 0.0394  | -0.1043 |
| 570 | hsa-mir-1255b-2 | 0.0236  | -0.1194 |
| 571 | hsa-mir-1256    | 0.079   | -0.0655 |
| 572 | hsa-mir-1257    | 0.1456  | -0.153  |
| 573 | hsa-mir-1258    | 0.0091  | -0.1119 |
| 574 | hsa-mir-1260a   | 0.1046  | -0.1619 |
| 575 | hsa-mir-1260b   | -0.0382 | -0.1704 |
| 576 | hsa-mir-1262    | 0.0663  | -0.2    |
| 577 | hsa-mir-1263    | 0.2309  | -0.1603 |
| 578 | hsa-mir-1265    | -0.0388 | -0.0877 |
| 579 | hsa-mir-1266    | -0.0083 | 0.0115  |
| 580 | hsa-mir-1267    | -0.1552 | -0.0962 |
| 581 | hsa-mir-1269a   | -0.0433 | -0.0655 |
| 582 | hsa-mir-1269b   | -0.2836 | -0.1575 |
| 583 | hsa-mir-1270-1  | 0.0542  | -0.2664 |
| 584 | hsa-mir-1270-2  | 0.057   | -0.3098 |
| 585 | hsa-mir-1271    | 0.0294  | -0.1647 |
| 586 | hsa-mir-1272    | -0.0516 | -0.126  |
| 587 | hsa-mir-1273g   | -0.0448 | -0.0577 |
| 588 | hsa-mir-1275    | -0.0306 | -0.1458 |
| 589 | hsa-mir-1276    | 0.1885  | -0.1353 |
| 590 | hsa-mir-1277    | 0.0979  | -0.1726 |
| 591 | hsa-mir-1278    | -0.0638 | -0.1777 |
| 592 | hsa-mir-1279    | -0.0328 | -0.2993 |
| 593 | hsa-mir-1280    | -0.0061 | -0.0798 |
| 594 | hsa-mir-1281    | 0.0272  | 0.0637  |
| 595 | hsa-mir-1282    | -0.0684 | -0.006  |
| 596 | hsa-mir-1283-2  | -0.0668 | -0.2497 |
| 597 | hsa-mir-1284    | 0.0549  | -0.2046 |
| 598 | hsa-mir-1288    | 0.127   | -0.1524 |
| 599 | hsa-mir-1289-1  | 0.1189  | -0.204  |
| 600 | hsa-mir-1289-2  | 0.0429  | -0.3208 |
| 601 | hsa-mir-1291    | -0.0623 | -0.0856 |
| 602 | hsa-mir-1292    | -0.0239 | -0.1552 |
| 603 | hsa-mir-1294    | -0.0239 | -0.4675 |
| 604 | hsa-mir-1295a   | 0.1176  | -0.1721 |
| 605 | hsa-mir-1295b   | 0.0924  | -0.0546 |

---

---

|     |                 |         |         |
|-----|-----------------|---------|---------|
| 606 | hsa-mir-1296    | 0.1489  | -0.0925 |
| 607 | hsa-mir-1297    | 0.1149  | -0.1552 |
| 608 | hsa-mir-1298    | -0.038  | -0.1194 |
| 609 | hsa-mir-1302-1  | -0.1151 | -0.0824 |
| 610 | hsa-mir-1302-10 | -0.0638 | -0.2556 |
| 611 | hsa-mir-1302-4  | 0.0004  | 0.197   |
| 612 | hsa-mir-1302-6  | 0.0855  | 0.2863  |
| 613 | hsa-mir-1302-7  | 0.0415  | 0.2626  |
| 614 | hsa-mir-1302-8  | 0.0773  | 0.1508  |
| 615 | hsa-mir-1302-9  | -0.0707 | 0.2283  |
| 616 | hsa-mir-1303    | -0.0954 | 0.5237  |
| 617 | hsa-mir-1305    | -0.1965 | 0.2946  |
| 618 | hsa-mir-1306    | -0.0923 | 0.1054  |
| 619 | hsa-mir-1307    | 0.0294  | -0.0452 |
| 620 | hsa-mir-1321    | 0.0401  | 0.0258  |
| 621 | hsa-mir-1322    | 0.1462  | 0.1825  |
| 622 | hsa-mir-1323    | -0.0321 | 0.0965  |
| 623 | hsa-mir-1324    | -0.1318 | 0.1219  |
| 624 | hsa-mir-1343    | -0.0784 | 0.253   |
| 625 | hsa-mir-1468    | -0.2269 | 0.1937  |
| 626 | hsa-mir-1469    | -0.09   | 0.1667  |
| 627 | hsa-mir-1470    | -0.0577 | 0.0586  |
| 628 | hsa-mir-1471    | 0.0626  | 0.1468  |
| 629 | hsa-mir-1537    | 0.0041  | 0.1084  |
| 630 | hsa-mir-1539    | -0.0684 | 0.078   |
| 631 | hsa-mir-1587    | -0.0939 | 0.1496  |
| 632 | hsa-mir-1825    | -0.3622 | 0.2493  |
| 633 | hsa-mir-1827    | -0.035  | 0.34    |
| 634 | hsa-mir-1908    | -0.127  | 0.137   |
| 635 | hsa-mir-1909    | 0.0535  | -0.0511 |
| 636 | hsa-mir-1910    | -0.0562 | 0.0488  |
| 637 | hsa-mir-1911    | 0.0535  | 0.0604  |
| 638 | hsa-mir-1912    | 0.224   | 0.2821  |
| 639 | hsa-mir-1913    | 0.0472  | 0.1277  |
| 640 | hsa-mir-1914    | -0.3601 | 0.3131  |
| 641 | hsa-mir-1915    | -0.0441 | 0.2795  |
| 642 | hsa-mir-1976    | -0.265  | 0.0804  |
| 643 | hsa-mir-2052    | -0.135  | 0.0076  |
| 644 | hsa-mir-2053    | -0.0388 | 0.1393  |
| 645 | hsa-mir-2054    | 0.127   | 0.1491  |
| 646 | hsa-mir-2110    | 0.0828  | 0.1236  |
| 647 | hsa-mir-2113    | 0.0486  | 0.1769  |
| 648 | hsa-mir-2114    | -0.4048 | 0.2951  |
| 649 | hsa-mir-2116    | -0.1765 | 0.3177  |

---

---

|     |                |         |         |
|-----|----------------|---------|---------|
| 650 | hsa-mir-2276   | -0.1585 | 0.0971  |
| 651 | hsa-mir-2277   | 0.0365  | 0.0622  |
| 652 | hsa-mir-2278   | 0.0703  | 0.1724  |
| 653 | hsa-mir-2355   | -0.0142 | 0.2042  |
| 654 | hsa-mir-2392   | 0.131   | 0.292   |
| 655 | hsa-mir-2467   | 0.1685  | 0.3947  |
| 656 | hsa-mir-2681   | 0.0048  | 0.3208  |
| 657 | hsa-mir-2682   | 0.0724  | 0.3899  |
| 658 | hsa-mir-2909   | 0.0924  | 0.0012  |
| 659 | hsa-mir-2964a  | 0.0759  | -0.0588 |
| 660 | hsa-mir-3064   | -0.0157 | 0       |
| 661 | hsa-mir-3074   | 0.0429  | 0.0291  |
| 662 | hsa-mir-3115   | 0.0584  | 0.1478  |
| 663 | hsa-mir-3116-1 | -0.2801 | -0.0012 |
| 664 | hsa-mir-3116-2 | -0.0061 | 0.0263  |
| 665 | hsa-mir-3117   | -0.1948 | -0.0386 |
| 666 | hsa-mir-3118-1 | 0.2032  | -0.0029 |
| 667 | hsa-mir-3118-2 | 0.0465  | -0.1641 |
| 668 | hsa-mir-3118-3 | 0.0647  | -0.0867 |
| 669 | hsa-mir-3118-4 | 0.1436  | -0.1171 |
| 670 | hsa-mir-3118-5 | 0.1363  | -0.181  |
| 671 | hsa-mir-3118-6 | 0.1249  | 0.0515  |
| 672 | hsa-mir-3119-1 | 0.186   | 0.1608  |
| 673 | hsa-mir-3119-2 | 0.0061  | -0.0655 |
| 674 | hsa-mir-3120   | 0.1025  | -0.0874 |
| 675 | hsa-mir-3121   | 0.0433  | -0.1994 |
| 676 | hsa-mir-3122   | -0.1222 | -0.1015 |
| 677 | hsa-mir-3123   | -0.0513 | -0.0947 |
| 678 | hsa-mir-3125   | -0.0466 | -0.054  |
| 679 | hsa-mir-3126   | -0.0354 | -0.0613 |
| 680 | hsa-mir-3127   | -0.0945 | 0.0223  |
| 681 | hsa-mir-3128   | 0.0508  | 0.0017  |
| 682 | hsa-mir-3130-1 | 0.1513  | -0.1378 |
| 683 | hsa-mir-3130-2 | -0.0952 | -0.0764 |
| 684 | hsa-mir-3132   | -0.0433 | -0.0151 |
| 685 | hsa-mir-3133   | 0.0551  | -0.0215 |
| 686 | hsa-mir-3135b  | -0.0139 | -0.0631 |
| 687 | hsa-mir-3136   | 0.0508  | -0.0904 |
| 688 | hsa-mir-3137   | 0.0131  | 0.0687  |
| 689 | hsa-mir-3138   | 0.0352  | -0.0116 |
| 690 | hsa-mir-3139   | 0.1303  | -0.1875 |
| 691 | hsa-mir-3140   | -0.0707 | -0.1628 |
| 692 | hsa-mir-3141   | 0.0086  | -0.1077 |
| 693 | hsa-mir-3142   | 0.0851  | -0.1146 |

---

---

|     |                |         |         |
|-----|----------------|---------|---------|
| 694 | hsa-mir-3143   | 0.0446  | -0.0262 |
| 695 | hsa-mir-3144   | -0.0158 | -0.0023 |
| 696 | hsa-mir-3145   | 0.0289  | -0.0017 |
| 697 | hsa-mir-3146   | -0.0295 | 0.0621  |
| 698 | hsa-mir-3147   | -0.008  | 0.0905  |
| 699 | hsa-mir-3148   | 0.0213  | 0.0448  |
| 700 | hsa-mir-3149   | -0.0809 | 0.0257  |
| 701 | hsa-mir-3150a  | 0.0258  | 0.0319  |
| 702 | hsa-mir-3150b  | 0.0433  | 0.1263  |
| 703 | hsa-mir-3151   | -0.6214 | 0.2209  |
| 704 | hsa-mir-3152   | -0.0707 | 0.1061  |
| 705 | hsa-mir-3153   | -0.001  | 0.2054  |
| 706 | hsa-mir-3154   | 0.0582  | 0.1937  |
| 707 | hsa-mir-3155a  | 0.0729  | 0.1277  |
| 708 | hsa-mir-3156-1 | 0.0607  | 0.1232  |
| 709 | hsa-mir-3156-2 | 0.0302  | 0.1515  |
| 710 | hsa-mir-3156-3 | 0.0656  | 0.198   |
| 711 | hsa-mir-3157   | -0.0802 | 0.1641  |
| 712 | hsa-mir-3158-2 | -0.0204 | 0.0898  |
| 713 | hsa-mir-3160-1 | -0.1511 | 0.3119  |
| 714 | hsa-mir-3160-2 | 0.0106  | 0.0789  |
| 715 | hsa-mir-3161   | 0.0016  | 0.1422  |
| 716 | hsa-mir-3162   | -0.0473 | 0.0995  |
| 717 | hsa-mir-3163   | 0.0699  | 0.0109  |
| 718 | hsa-mir-3164   | 0.0213  | 0.1532  |
| 719 | hsa-mir-3165   | -0.0223 | 0.1388  |
| 720 | hsa-mir-3166   | -0.0506 | 0.1154  |
| 721 | hsa-mir-3167   | 0.1138  | 0.23    |
| 722 | hsa-mir-3169   | 0.0283  | 0.1176  |
| 723 | hsa-mir-3170   | -0.1076 | -0.0732 |
| 724 | hsa-mir-3171   | -0.0367 | 0.0818  |
| 725 | hsa-mir-3173   | 0.1013  | 0.2665  |
| 726 | hsa-mir-3174   | -0.1076 | 0.1809  |
| 727 | hsa-mir-3175   | 0.0302  | 0.2259  |
| 728 | hsa-mir-3176   | -0.0029 | 0.1575  |
| 729 | hsa-mir-3178   | -0.0486 | 0.1641  |
| 730 | hsa-mir-3180-1 | 0.0226  | 0.0218  |
| 731 | hsa-mir-3180-2 | 0.0352  | 0.1204  |
| 732 | hsa-mir-3182   | 0.0477  | 0.1221  |
| 733 | hsa-mir-3183   | 0.0383  | 0.0621  |
| 734 | hsa-mir-3184   | -0.1027 | 0.2133  |
| 735 | hsa-mir-3185   | 0.168   | 0.2326  |
| 736 | hsa-mir-3186   | -0.087  | 0.266   |
| 737 | hsa-mir-3187   | 0.0458  | 0.1193  |

---

---

|     |                |         |         |
|-----|----------------|---------|---------|
| 738 | hsa-mir-3188   | 0.0959  | 0.1316  |
| 739 | hsa-mir-3189   | -0.0493 | 0.0343  |
| 740 | hsa-mir-3190   | -0.0029 | 0.1221  |
| 741 | hsa-mir-3191   | -0.0633 | 0.0158  |
| 742 | hsa-mir-3192   | -0.1734 | 0.1012  |
| 743 | hsa-mir-3193   | 0.052   | -0.4475 |
| 744 | hsa-mir-3194   | 0.0851  | 0.2476  |
| 745 | hsa-mir-3196   | -0.0262 | 0.1684  |
| 746 | hsa-mir-3197   | 0.052   | 0.2796  |
| 747 | hsa-mir-3198-1 | -0.0904 | 0.2233  |
| 748 | hsa-mir-3198-2 | -0.0061 | 0.2538  |
| 749 | hsa-mir-3199-1 | -0.0308 | 0.2471  |
| 750 | hsa-mir-3199-2 | -0.1271 | 0.3089  |
| 751 | hsa-mir-3200   | 0.0283  | -0.0308 |
| 752 | hsa-mir-3201   | 0.0352  | -0.2591 |
| 753 | hsa-mir-3202-1 | 0.1109  | -0.0168 |
| 754 | hsa-mir-3529   | -0.0633 | -0.0093 |
| 755 | hsa-mir-3591   | -0.4397 | -0.1345 |
| 756 | hsa-mir-3605   | 0.0302  | -0.1365 |
| 757 | hsa-mir-3606   | 0.0289  | 0.0462  |
| 758 | hsa-mir-3607   | -0.062  | 0.0752  |
| 759 | hsa-mir-3609   | 0.1091  | 0.039   |
| 760 | hsa-mir-3611   | 0.0314  | -0.0451 |
| 761 | hsa-mir-3612   | -0.0191 | -0.0637 |
| 762 | hsa-mir-3613   | 0.0483  | -0.1639 |
| 763 | hsa-mir-3614   | 0.0163  | -0.0819 |
| 764 | hsa-mir-3615   | 0.1203  | -0.0957 |
| 765 | hsa-mir-3616   | -0.0158 | -0.0541 |
| 766 | hsa-mir-3617   | 0.0594  | -0.0401 |
| 767 | hsa-mir-3618   | 0.0959  | 0.0281  |
| 768 | hsa-mir-3619   | 0.1737  | -0.3522 |
| 769 | hsa-mir-3620   | -0.1778 | -0.0224 |
| 770 | hsa-mir-3622a  | -0.2273 | 0.0019  |
| 771 | hsa-mir-3622b  | 0.0743  | 0.0257  |
| 772 | hsa-mir-3646   | -0.327  | -0.0573 |
| 773 | hsa-mir-3648   | -0.0393 | -0.008  |
| 774 | hsa-mir-3649   | 0.0101  | -0.0839 |
| 775 | hsa-mir-3650   | -0.3149 | 0.0049  |
| 776 | hsa-mir-3651   | -0.0322 | -0.0199 |
| 777 | hsa-mir-3652   | -0.4828 | 0.064   |
| 778 | hsa-mir-3653   | 0.0794  | -0.0898 |
| 779 | hsa-mir-3655   | 0.016   | 0.0563  |
| 780 | hsa-mir-3656   | -0.1561 | -0.1632 |
| 781 | hsa-mir-3657   | -0.0006 | 0.0551  |

---

---

|     |                |         |         |
|-----|----------------|---------|---------|
| 782 | hsa-mir-3658   | 0.0548  | -0.127  |
| 783 | hsa-mir-3659   | -0.2444 | 0.0926  |
| 784 | hsa-mir-3660   | -0.0922 | 0.0147  |
| 785 | hsa-mir-3661   | -0.5783 | -0.0205 |
| 786 | hsa-mir-3662   | -0.0228 | -0.1508 |
| 787 | hsa-mir-3663   | 0.1046  | 0       |
| 788 | hsa-mir-3664   | 0.0491  | -0.0754 |
| 789 | hsa-mir-3665   | 0.0207  | 0.1505  |
| 790 | hsa-mir-3666   | -0.0141 | 0.0699  |
| 791 | hsa-mir-3667   | 0.0589  | 0.1093  |
| 792 | hsa-mir-3668   | -0.1797 | 0.1139  |
| 793 | hsa-mir-3670-1 | -0.1687 | 0.0705  |
| 794 | hsa-mir-3670-2 | 0.147   | 0.0263  |
| 795 | hsa-mir-3671   | -0.0305 | 0.0634  |
| 796 | hsa-mir-3672   | 0.0133  | -0.0006 |
| 797 | hsa-mir-3674   | 0.0599  | 0.0664  |
| 798 | hsa-mir-3676   | -0.1341 | 0.048   |
| 799 | hsa-mir-3677   | -0.0802 | -0.0833 |
| 800 | hsa-mir-3678   | -0.137  | 0.0777  |
| 801 | hsa-mir-3680-2 | -0.1675 | 0.0405  |
| 802 | hsa-mir-3681   | -0.0039 | -0.0969 |
| 803 | hsa-mir-3682   | 0.0355  | 0.0264  |
| 804 | hsa-mir-3684   | 0.0276  | 0.0332  |
| 805 | hsa-mir-3685   | 0.0615  | 0.0837  |
| 806 | hsa-mir-3686   | -0.1882 | -0.0464 |
| 807 | hsa-mir-3687   | 0.0207  | -0.0932 |
| 808 | hsa-mir-3688-2 | 0.0042  | -0.1441 |
| 809 | hsa-mir-3691   | -0.0012 | 0.0695  |
| 810 | hsa-mir-3692   | 0.0255  | -0.0736 |
| 811 | hsa-mir-3713   | -0.0256 | 0.1124  |
| 812 | hsa-mir-3714   | 0.0672  | 0.1577  |
| 813 | hsa-mir-3907   | -0.1229 | 0.2171  |
| 814 | hsa-mir-3909   | -0.0017 | -0.0446 |
| 815 | hsa-mir-3910-1 | 0.0042  | 0.2265  |
| 816 | hsa-mir-3910-2 | 0.1289  | -0.0602 |
| 817 | hsa-mir-3911   | -0.0655 | -0.0192 |
| 818 | hsa-mir-3912   | 0.0723  | -0.0858 |
| 819 | hsa-mir-3913-1 | 0.1387  | 0.0303  |
| 820 | hsa-mir-3913-2 | -0.2566 | 0.0628  |
| 821 | hsa-mir-3914-1 | 0.0537  | 0.0957  |
| 822 | hsa-mir-3914-2 | -0.0071 | -0.1288 |
| 823 | hsa-mir-3915   | 0.0439  | 0.1701  |
| 824 | hsa-mir-3916   | -0.0928 | -0.056  |
| 825 | hsa-mir-3917   | -0.0311 | 0.0349  |

---

---

|     |                |         |         |
|-----|----------------|---------|---------|
| 826 | hsa-mir-3918   | 0.0936  | -0.1647 |
| 827 | hsa-mir-3919   | 0.1126  | 0.168   |
| 828 | hsa-mir-3920   | 0.1801  | -0.0198 |
| 829 | hsa-mir-3921   | -0.0289 | 0.1214  |
| 830 | hsa-mir-3922   | -0.1925 | -0.1402 |
| 831 | hsa-mir-3923   | 0.1186  | 0.0201  |
| 832 | hsa-mir-3924   | 0.0522  | 0.045   |
| 833 | hsa-mir-3925   | 0.0656  | 0.0584  |
| 834 | hsa-mir-3926-1 | 0.1962  | -0.1244 |
| 835 | hsa-mir-3926-2 | 0.1136  | 0.0178  |
| 836 | hsa-mir-3927   | 0.2032  | -0.0233 |
| 837 | hsa-mir-3928   | 0.0661  | 0.0601  |
| 838 | hsa-mir-3934   | 0.0444  | 0.1188  |
| 839 | hsa-mir-3935   | -0.0554 | 0.1357  |
| 840 | hsa-mir-3936   | 0.061   | 0.1166  |
| 841 | hsa-mir-3937   | 0.1625  | 0.0761  |
| 842 | hsa-mir-3938   | 0.1111  | 0.0881  |
| 843 | hsa-mir-3939   | 0.1021  | 0.2305  |
| 844 | hsa-mir-3940   | 0.0512  | -0.0452 |
| 845 | hsa-mir-3941   | -0.0234 | 0.0244  |
| 846 | hsa-mir-3942   | -0.0757 | -0.0997 |
| 847 | hsa-mir-3943   | -0.0098 | -0.0459 |
| 848 | hsa-mir-3944   | 0.1265  | -0.0275 |
| 849 | hsa-mir-3945   | -0.127  | -0.0562 |
| 850 | hsa-mir-3972   | -0.006  | 0.1362  |
| 851 | hsa-mir-3973   | 0.0656  | 0.0637  |
| 852 | hsa-mir-3974   | 0.0875  | 0.0637  |
| 853 | hsa-mir-3975   | 0.1041  | -0.012  |
| 854 | hsa-mir-3976   | 0.0428  | -0.0241 |
| 855 | hsa-mir-3977   | -0.0006 | -0.1871 |
| 856 | hsa-mir-3978   | 0.1844  | -0.0687 |
| 857 | hsa-mir-4251   | -0.3243 | -0.2115 |
| 858 | hsa-mir-4252   | -0.0223 | -0.0167 |
| 859 | hsa-mir-4253   | 0.1816  | 0.0757  |
| 860 | hsa-mir-4254   | 0.1744  | 0.102   |
| 861 | hsa-mir-4255   | 0.1905  | 0.0257  |
| 862 | hsa-mir-4256   | 0.1051  | 0.1483  |
| 863 | hsa-mir-4257   | 0.0718  | -0.1069 |
| 864 | hsa-mir-4258   | 0.1825  | 0.049   |
| 865 | hsa-mir-4259   | -0.0503 | -0.1256 |
| 866 | hsa-mir-4260   | 0.0275  | 0.0152  |
| 867 | hsa-mir-4261   | 0.0761  | 0.135   |
| 868 | hsa-mir-4262   | -0.5242 | 0.0995  |
| 869 | hsa-mir-4263   | -0.382  | 0.1106  |

---



---

|     |                |         |         |
|-----|----------------|---------|---------|
| 870 | hsa-mir-4264   | 0.0275  | 0.1435  |
| 871 | hsa-mir-4265   | 0.0689  | -0.0813 |
| 872 | hsa-mir-4266   | 0.1407  | 0.1259  |
| 873 | hsa-mir-4267   | -0.1162 | 0.049   |
| 874 | hsa-mir-4268   | 0.1112  | 0.1891  |
| 875 | hsa-mir-4269   | 0.0259  | 0.1809  |
| 876 | hsa-mir-4270   | -0.3619 | 0.1885  |
| 877 | hsa-mir-4271   | -0.1313 | 0.025   |
| 878 | hsa-mir-4272   | 0.0275  | 0.1192  |
| 879 | hsa-mir-4274   | -0.1508 | 0.0205  |
| 880 | hsa-mir-4275   | 0.0761  | 0.038   |
| 881 | hsa-mir-4276   | -0.3502 | -0.0926 |
| 882 | hsa-mir-4277   | 0.0816  | 0.1014  |
| 883 | hsa-mir-4278   | -0.1622 | 0.165   |
| 884 | hsa-mir-4279   | -0.1851 | 0.2679  |
| 885 | hsa-mir-4280   | -0.1296 | 0.2236  |
| 886 | hsa-mir-4281   | -0.1307 | 0.2156  |
| 887 | hsa-mir-4282   | 0.0306  | 0.0902  |
| 888 | hsa-mir-4283-1 | 0.1416  | 0.2007  |
| 889 | hsa-mir-4283-2 | -0.4303 | 0.0445  |
| 890 | hsa-mir-4284   | -0.1467 | 0.2287  |
| 891 | hsa-mir-4285   | -0.6633 | -0.1345 |
| 892 | hsa-mir-4286   | -0.0823 | 0.0395  |
| 893 | hsa-mir-4287   | -0.0114 | 0.0038  |
| 894 | hsa-mir-4288   | 0.0576  | -0.1586 |
| 895 | hsa-mir-4289   | -0.0272 | -0.1323 |
| 896 | hsa-mir-4290   | 0.1319  | 0.0297  |
| 897 | hsa-mir-4291   | 0.0684  | -0.0119 |
| 898 | hsa-mir-4292   | 0.2334  | -0.1227 |
| 899 | hsa-mir-4293   | -0.2544 | -0.0419 |
| 900 | hsa-mir-4294   | -0.0715 | -0.1132 |
| 901 | hsa-mir-4295   | 0.0452  | -0.0451 |
| 902 | hsa-mir-4296   | -0.0531 | -0.1706 |
| 903 | hsa-mir-4297   | -0.0266 | -0.0355 |
| 904 | hsa-mir-4298   | 0.0968  | -0.2156 |
| 905 | hsa-mir-4299   | -0.1467 | -0.1112 |
| 906 | hsa-mir-4302   | -0.0459 | -0.0627 |
| 907 | hsa-mir-4303   | 0.0499  | -0.0627 |
| 908 | hsa-mir-4304   | -0.0817 | -0.1193 |
| 909 | hsa-mir-4305   | 0.0143  | -0.0088 |
| 910 | hsa-mir-4307   | 0.0338  | -0.1876 |
| 911 | hsa-mir-4308   | 0.053   | 0.0407  |
| 912 | hsa-mir-4309   | -0.0071 | -0.2156 |
| 913 | hsa-mir-4311   | 0.1037  | 0.0211  |

---

---

|     |                |         |         |
|-----|----------------|---------|---------|
| 914 | hsa-mir-4312   | -0.5883 | 0.0193  |
| 915 | hsa-mir-4313   | 0.1142  | -0.1876 |
| 916 | hsa-mir-4314   | 0.0638  | -0.2149 |
| 917 | hsa-mir-4315-1 | -0.0631 | -0.1323 |
| 918 | hsa-mir-4315-2 | 0.0233  | -0.0844 |
| 919 | hsa-mir-4316   | 0.0592  | -0.2963 |
| 920 | hsa-mir-4317   | -0.0442 | -0.1918 |
| 921 | hsa-mir-4318   | 0.0411  | -0.0272 |
| 922 | hsa-mir-4319   | 0.0041  | -0.4562 |
| 923 | hsa-mir-4320   | 0.1162  | 0.0168  |
| 924 | hsa-mir-4321   | 0.071   | -0.1426 |
| 925 | hsa-mir-4323   | 0.0551  | -0.1997 |
| 926 | hsa-mir-4324   | -0.0437 | -0.1078 |
| 927 | hsa-mir-4325   | 0.0998  | -0.2048 |
| 928 | hsa-mir-4326   | 0.0674  | -0.1933 |
| 929 | hsa-mir-4327   | 0.1537  | -0.0785 |
| 930 | hsa-mir-4328   | 0.1662  | -0.0023 |
| 931 | hsa-mir-4329   | 0.1518  | -0.1221 |
| 932 | hsa-mir-4330   | -0.1029 | -0.0221 |
| 933 | hsa-mir-4417   | 0.0832  | -0.2142 |
| 934 | hsa-mir-4418   | -0.0409 | -0.0725 |
| 935 | hsa-mir-4419a  | 0.1648  | -0.0745 |
| 936 | hsa-mir-4419b  | 0.146   | -0.0246 |
| 937 | hsa-mir-4420   | 0.1137  | -0.1323 |
| 938 | hsa-mir-4422   | 0.2747  | -0.0523 |
| 939 | hsa-mir-4423   | 0.2247  | -0.1207 |
| 940 | hsa-mir-4425   | -0.0168 | -0.1829 |
| 941 | hsa-mir-4427   | -0.0077 | -0.2506 |
| 942 | hsa-mir-4429   | 0.0009  | -0.2758 |
| 943 | hsa-mir-4431   | 0.128   | -0.1432 |
| 944 | hsa-mir-4432   | 0.1368  | -0.1489 |
| 945 | hsa-mir-4433   | -0.2495 | -0.3885 |
| 946 | hsa-mir-4434   | 0.1082  | -0.1994 |
| 947 | hsa-mir-4435-1 | 0.0317  | -0.0892 |
| 948 | hsa-mir-4435-2 | -0.1231 | -0.0733 |
| 949 | hsa-mir-4437   | 0.1107  | -0.1559 |
| 950 | hsa-mir-4439   | 0.0478  | -0.2831 |
| 951 | hsa-mir-4442   | 0.1941  | -0.2751 |
| 952 | hsa-mir-4444-2 | 0.1695  | -0.2831 |
| 953 | hsa-mir-4446   | -0.2297 | -0.1911 |
| 954 | hsa-mir-4447   | 0.146   | -0.2463 |
| 955 | hsa-mir-4451   | -0.0564 | -0.0018 |
| 956 | hsa-mir-4455   | -0.057  | -0.1653 |
| 957 | hsa-mir-4457   | 0.1304  | 0.0036  |

---

---

|      |                |         |         |
|------|----------------|---------|---------|
| 958  | hsa-mir-4458   | 0.0684  | -0.2456 |
| 959  | hsa-mir-4460   | 0.125   | -0.257  |
| 960  | hsa-mir-4462   | 0.1082  | -0.5763 |
| 961  | hsa-mir-4463   | -0.0299 | -0.2286 |
| 962  | hsa-mir-4465   | 0.131   | -0.1646 |
| 963  | hsa-mir-4467   | 0.0834  | -0.2132 |
| 964  | hsa-mir-4468   | 0.0717  | -0.1525 |
| 965  | hsa-mir-4469   | 0.0694  | -0.2042 |
| 966  | hsa-mir-4470   | 0.0255  | -0.2614 |
| 967  | hsa-mir-4472-1 | -0.0273 | -0.4003 |
| 968  | hsa-mir-4478   | 0.0298  | -0.2477 |
| 969  | hsa-mir-4482-1 | 0.1279  | -0.2449 |
| 970  | hsa-mir-4484   | 0.148   | -0.1754 |
| 971  | hsa-mir-4486   | 0.1591  | -0.1519 |
| 972  | hsa-mir-4487   | 0.1079  | -0.1274 |
| 973  | hsa-mir-4488   | -0.0743 | -0.286  |
| 974  | hsa-mir-4489   | 0.0274  | -0.2167 |
| 975  | hsa-mir-4490   | -0.1457 | -0.2941 |
| 976  | hsa-mir-4491   | -0.0079 | -0.3995 |
| 977  | hsa-mir-4493   | -0.2439 | -0.3209 |
| 978  | hsa-mir-4494   | 0.1644  | -0.1432 |
| 979  | hsa-mir-4495   | 0.1292  | -0.0695 |
| 980  | hsa-mir-4496   | 0.075   | -0.0752 |
| 981  | hsa-mir-4497   | -0.0108 | -0.1612 |
| 982  | hsa-mir-4498   | -0.0049 | -0.0714 |
| 983  | hsa-mir-4499   | 0.023   | -0.1653 |
| 984  | hsa-mir-4501   | -0.0501 | -0.1163 |
| 985  | hsa-mir-4504   | 0.0908  | -0.2527 |
| 986  | hsa-mir-4505   | 0.1715  | 0.0309  |
| 987  | hsa-mir-4506   | 0.0533  | -0.1829 |
| 988  | hsa-mir-4508   | 0.0876  | 0.0951  |
| 989  | hsa-mir-4509-1 | 0.0196  | 0.0399  |
| 990  | hsa-mir-4509-2 | -0.0517 | 0.0302  |
| 991  | hsa-mir-4509-3 | -0.0024 | -0.0106 |
| 992  | hsa-mir-4510   | -0.0304 | 0.0192  |
| 993  | hsa-mir-4511   | 0.0745  | 0.0704  |
| 994  | hsa-mir-4513   | 0.1387  | 0.091   |
| 995  | hsa-mir-4514   | 0.0211  | -0.0806 |
| 996  | hsa-mir-4515   | 0.0571  | -0.0617 |
| 997  | hsa-mir-4517   | 0.0089  | -0.0138 |
| 998  | hsa-mir-4518   | -0.0198 | -0.0839 |
| 999  | hsa-mir-4519   | -0.0837 | -0.0998 |
| 1000 | hsa-mir-4520a  | -0.211  | 0.0429  |
| 1001 | hsa-mir-4520b  | 0.1165  | 0.1067  |

---

---

|      |                |         |         |
|------|----------------|---------|---------|
| 1002 | hsa-mir-4521   | 0.1644  | 0.1245  |
| 1003 | hsa-mir-4522   | -0.0079 | 0.0338  |
| 1004 | hsa-mir-4523   | -0.0512 | 0.0142  |
| 1005 | hsa-mir-4524a  | 0.0703  | 0.2833  |
| 1006 | hsa-mir-4524b  | -0.0435 | -0.0094 |
| 1007 | hsa-mir-4525   | 0.0148  | 0.0675  |
| 1008 | hsa-mir-4526   | -0.1968 | -0.0468 |
| 1009 | hsa-mir-4527   | 0.0538  | 0.0375  |
| 1010 | hsa-mir-4528   | 0.1324  | 0.1387  |
| 1011 | hsa-mir-4529   | -0.0123 | -0.0892 |
| 1012 | hsa-mir-4530   | -0.1058 | -0.0919 |
| 1013 | hsa-mir-4531   | -0.0916 | -0.0019 |
| 1014 | hsa-mir-4532   | -0.1058 | -0.0087 |
| 1015 | hsa-mir-4533   | -0.0754 | -0.0056 |
| 1016 | hsa-mir-4534   | -0.2334 | -0.1591 |
| 1017 | hsa-mir-4535   | -0.0208 | 0.0025  |
| 1018 | hsa-mir-4536-1 | 0.1315  | 0.2077  |
| 1019 | hsa-mir-4536-2 | -0.0369 | 0.0441  |
| 1020 | hsa-mir-4540   | 0.0279  | -0.1186 |
| 1021 | hsa-mir-4633   | -0.1128 | -0.0169 |
| 1022 | hsa-mir-4634   | -0.1621 | 0.021   |
| 1023 | hsa-mir-4635   | -0.0816 | 0.1062  |
| 1024 | hsa-mir-4636   | -0.1906 | 0.013   |
| 1025 | hsa-mir-4637   | -0.041  | 0.3142  |
| 1026 | hsa-mir-4638   | 0.0969  | 0.1645  |
| 1027 | hsa-mir-4639   | 0.0656  | 0.0381  |
| 1028 | hsa-mir-4640   | 0.0524  | 0.0621  |
| 1029 | hsa-mir-4641   | 0.0148  | 0.0787  |
| 1030 | hsa-mir-4642   | -0.2363 | 0.052   |
| 1031 | hsa-mir-4643   | 0.1863  | 0.1165  |
| 1032 | hsa-mir-4644   | 0.0885  | 0.128   |
| 1033 | hsa-mir-4645   | 0.0881  | 0.1387  |
| 1034 | hsa-mir-4646   | 0.1083  | 0.0805  |
| 1035 | hsa-mir-4647   | 0.05    | 0.0572  |
| 1036 | hsa-mir-4648   | -0.065  | -0.016  |
| 1037 | hsa-mir-4649   | 0.0404  | -0.0263 |
| 1038 | hsa-mir-4650-1 | -0.1594 | -0.0584 |
| 1039 | hsa-mir-4650-2 | -0.2334 | 0.0512  |
| 1040 | hsa-mir-4651   | -0.1506 | 0.1075  |
| 1041 | hsa-mir-4652   | 0.1115  | 0.1703  |
| 1042 | hsa-mir-4653   | 0.0862  | 0.0756  |
| 1043 | hsa-mir-4654   | 0.1115  | -0.049  |
| 1044 | hsa-mir-4655   | -0.0123 | 0.018   |
| 1045 | hsa-mir-4656   | -0.0188 | -0.0673 |

---

---

|      |                |         |         |
|------|----------------|---------|---------|
| 1046 | hsa-mir-4657   | -0.0583 | -0.0131 |
| 1047 | hsa-mir-4658   | -0.078  | -0.1905 |
| 1048 | hsa-mir-4659a  | -0.1106 | 0.0858  |
| 1049 | hsa-mir-4660   | -0.295  | 0.1808  |
| 1050 | hsa-mir-4661   | 0.0764  | 0.0842  |
| 1051 | hsa-mir-4662a  | 0.0079  | -0.1131 |
| 1052 | hsa-mir-4662b  | -0.0578 | -0.0292 |
| 1053 | hsa-mir-4663   | 0.0346  | 0.0243  |
| 1054 | hsa-mir-4664   | -0.2398 | -0.011  |
| 1055 | hsa-mir-4665   | -0.1353 | -0.1045 |
| 1056 | hsa-mir-4666a  | -0.0094 | 0.0464  |
| 1057 | hsa-mir-4667   | 0.0112  | 0.0086  |
| 1058 | hsa-mir-4669   | 0.3321  | 0.1444  |
| 1059 | hsa-mir-4670   | 0.4916  | -0.019  |
| 1060 | hsa-mir-4671   | 0.1624  | 0.2048  |
| 1061 | hsa-mir-4672   | 0.2769  | -0.0881 |
| 1062 | hsa-mir-4673   | 0.345   | -0.1074 |
| 1063 | hsa-mir-4675   | 0.1204  | -0.0057 |
| 1064 | hsa-mir-4676   | -0.1562 | 0.0217  |
| 1065 | hsa-mir-4677   | -0.3948 | -0.0938 |
| 1066 | hsa-mir-4678   | -0.0369 | 0.0217  |
| 1067 | hsa-mir-4679-2 | -0.0622 | -0.1275 |
| 1068 | hsa-mir-4680   | -0.0851 | -0.0255 |
| 1069 | hsa-mir-4681   | -0.2421 | -0.0647 |
| 1070 | hsa-mir-4682   | -0.3046 | 0.0561  |
| 1071 | hsa-mir-4683   | -0.4721 | 0.3122  |
| 1072 | hsa-mir-4684   | -0.3612 | 0.1041  |
| 1073 | hsa-mir-4685   | -0.0397 | 0.0248  |
| 1074 | hsa-mir-4686   | 0.2451  | 0.0708  |
| 1075 | hsa-mir-4687   | 0.038   | 0.1266  |
| 1076 | hsa-mir-4688   | 0.0233  | 0.0464  |
| 1077 | hsa-mir-4689   | -0.2071 | 0.0367  |
| 1078 | hsa-mir-4690   | -0.1977 | 0.161   |
| 1079 | hsa-mir-4691   | -0.2071 | 0.1391  |
| 1080 | hsa-mir-4692   | -0.5798 | 0.0042  |
| 1081 | hsa-mir-4693   | 0.0577  | 0.0107  |
| 1082 | hsa-mir-4694   | 0.2937  | -0.2485 |
| 1083 | hsa-mir-4695   | 0.2736  | 0.0623  |
| 1084 | hsa-mir-4696   | 0.1721  | -0.0416 |
| 1085 | hsa-mir-4697   | 0.0926  | -0.0069 |
| 1086 | hsa-mir-4698   | -0.0313 | 0.1065  |
| 1087 | hsa-mir-4699   | -0.1441 | -0.2439 |
| 1088 | hsa-mir-4700   | -0.5397 | -0.0853 |
| 1089 | hsa-mir-4701   | 0.3212  | -0.0535 |

---

---

|      |              |         |         |
|------|--------------|---------|---------|
| 1090 | hsa-mir-4703 | 0.2915  | -0.3011 |
| 1091 | hsa-mir-4705 | -0.2301 | -0.2901 |
| 1092 | hsa-mir-4706 | 0.1053  | -0.0141 |
| 1093 | hsa-mir-4707 | 0.042   | -0.053  |
| 1094 | hsa-mir-4708 | -0.0823 | 0.0308  |
| 1095 | hsa-mir-4709 | -0.0174 | -0.1053 |
| 1096 | hsa-mir-4710 | -0.2071 | -0.0807 |
| 1097 | hsa-mir-4711 | 0.381   | -0.0052 |
| 1098 | hsa-mir-4712 | 0.1709  | -0.0393 |
| 1099 | hsa-mir-4713 | 0.2781  | -0.1148 |
| 1100 | hsa-mir-4714 | 0.0837  | -0.0766 |
| 1101 | hsa-mir-4715 | 0.03    | -0.0146 |
| 1102 | hsa-mir-4716 | -0.0313 | 0.0655  |
| 1103 | hsa-mir-4717 | 0.0247  | 0.1798  |
| 1104 | hsa-mir-4718 | -0.349  | -0.1065 |
| 1105 | hsa-mir-4719 | 0.3266  | 0.0351  |
| 1106 | hsa-mir-4720 | 0.3004  | 0.0287  |
| 1107 | hsa-mir-4721 | 0.2185  | 0.0314  |
| 1108 | hsa-mir-4722 | 0.0538  | -0.0719 |
| 1109 | hsa-mir-4723 | -0.1114 | -0.0146 |
| 1110 | hsa-mir-4724 | -0.1276 | 0.026   |
| 1111 | hsa-mir-4725 | -0.0851 | -0.057  |
| 1112 | hsa-mir-4726 | -0.0808 | 0.2684  |
| 1113 | hsa-mir-4727 | 0.1428  | -0.0252 |
| 1114 | hsa-mir-4728 | 0.2566  | -0.008  |
| 1115 | hsa-mir-4729 | 0.149   | 0.0276  |
| 1116 | hsa-mir-4730 | 0.034   | -0.0783 |
| 1117 | hsa-mir-4731 | -0.001  | 0.0351  |
| 1118 | hsa-mir-4732 | -0.273  | 0.0718  |
| 1119 | hsa-mir-4733 | -0.1187 | 0.0405  |
| 1120 | hsa-mir-4735 | -0.0665 | 0.0655  |
| 1121 | hsa-mir-4736 | 0.297   | 0.0702  |
| 1122 | hsa-mir-4738 | 0.2915  | 0.2675  |
| 1123 | hsa-mir-4739 | 0.0273  | 0.0676  |
| 1124 | hsa-mir-4740 | 0.1636  | -0.0575 |
| 1125 | hsa-mir-4741 | -0.2229 | 0.1258  |
| 1126 | hsa-mir-4742 | -0.1396 | -0.018  |
| 1127 | hsa-mir-4743 | -0.1946 | -0.0162 |
| 1128 | hsa-mir-4744 | -0.1128 | -0.0279 |
| 1129 | hsa-mir-4745 | 0.4273  | -0.0649 |
| 1130 | hsa-mir-4746 | 0.3396  | 0.0029  |
| 1131 | hsa-mir-4747 | -0.1143 | -0.2503 |
| 1132 | hsa-mir-4749 | 0.1709  | 0.0289  |
| 1133 | hsa-mir-4750 | -0.0467 | -0.0045 |

---

---

|      |                |         |         |
|------|----------------|---------|---------|
| 1134 | hsa-mir-4751   | -0.0594 | 0.0974  |
| 1135 | hsa-mir-4752   | -0.2009 | -0.1337 |
| 1136 | hsa-mir-4753   | -0.3404 | -0.0804 |
| 1137 | hsa-mir-4755   | -0.0736 | -0.1806 |
| 1138 | hsa-mir-4756   | -0.0665 | -0.055  |
| 1139 | hsa-mir-4757   | 0.1477  | -0.3368 |
| 1140 | hsa-mir-4758   | -0.2182 | -0.0474 |
| 1141 | hsa-mir-4759   | -0.173  | 0.0484  |
| 1142 | hsa-mir-4760   | -0.3421 | -0.0204 |
| 1143 | hsa-mir-4761   | -0.2551 | -0.1523 |
| 1144 | hsa-mir-4762   | -0.3335 | -0.189  |
| 1145 | hsa-mir-4763   | -0.1684 | -0.1546 |
| 1146 | hsa-mir-4764   | -0.0147 | -0.0949 |
| 1147 | hsa-mir-4765   | 0.2067  | -0.3354 |
| 1148 | hsa-mir-4766   | -0.2024 | -0.1617 |
| 1149 | hsa-mir-4768   | -0.4129 | -0.0804 |
| 1150 | hsa-mir-4769   | -0.4911 | -0.0398 |
| 1151 | hsa-mir-4770   | -0.0119 | -0.1378 |
| 1152 | hsa-mir-4771-1 | -0.2913 | -0.0511 |
| 1153 | hsa-mir-4771-2 | 0.1051  | -0.1974 |
| 1154 | hsa-mir-4772   | -0.0391 | -0.1453 |
| 1155 | hsa-mir-4773-1 | 0.0145  | 0.3182  |
| 1156 | hsa-mir-4773-2 | -0.0094 | -0.0337 |
| 1157 | hsa-mir-4774   | 0.192   | 0.0073  |
| 1158 | hsa-mir-4776-1 | -0.0535 | -0.0233 |
| 1159 | hsa-mir-4776-2 | 0.0309  | -0.1341 |
| 1160 | hsa-mir-4777   | 0.0289  | -0.0499 |
| 1161 | hsa-mir-4778   | 0.0367  | -0.0735 |
| 1162 | hsa-mir-4780   | 0.087   | 0.0428  |
| 1163 | hsa-mir-4781   | 0.1453  | 0.0241  |
| 1164 | hsa-mir-4782   | 0.1032  | 0.0062  |
| 1165 | hsa-mir-4783   | -0.0391 | -0.0222 |
| 1166 | hsa-mir-4784   | 0.1051  | -0.0006 |
| 1167 | hsa-mir-4785   | 0.0833  | -0.0986 |
| 1168 | hsa-mir-4786   | -0.2178 | 0.0624  |
| 1169 | hsa-mir-4788   | 0.0599  | -0.0735 |
| 1170 | hsa-mir-4789   | -0.2475 | -0.036  |
| 1171 | hsa-mir-4790   | 0.0165  | -0.0074 |
| 1172 | hsa-mir-4791   | 0.1032  | -0.0383 |
| 1173 | hsa-mir-4792   | -0.2681 | 0.0373  |
| 1174 | hsa-mir-4793   | 0.0707  | -0.0314 |
| 1175 | hsa-mir-4794   | -0.261  | -0.0233 |
| 1176 | hsa-mir-4795   | -0.3137 | -0.1108 |
| 1177 | hsa-mir-4796   | -0.0501 | -0.0902 |

---

---

|      |              |         |         |
|------|--------------|---------|---------|
| 1178 | hsa-mir-4797 | -0.502  | -0.1441 |
| 1179 | hsa-mir-4798 | 0.1259  | -0.0256 |
| 1180 | hsa-mir-4799 | 0.1411  | 0.0051  |
| 1181 | hsa-mir-4800 | -0.0181 | 0.0645  |
| 1182 | hsa-mir-4801 | 0.0477  | -0.0233 |
| 1183 | hsa-mir-4802 | -0.0535 | 0.0439  |
| 1184 | hsa-mir-4803 | -0.141  | -0.064  |
| 1185 | hsa-mir-4804 | 0.0789  | 0.0494  |
| 1186 | hsa-mir-4999 | -0.046  | -0.1267 |
| 1187 | hsa-mir-5000 | 0.0983  | 0.0934  |
| 1188 | hsa-mir-5001 | -0.0371 | 0.0635  |
| 1189 | hsa-mir-5002 | 0.1686  | 0.0849  |
| 1190 | hsa-mir-5003 | 0.2691  | -0.0476 |
| 1191 | hsa-mir-5004 | -0.0709 | 0.0472  |
| 1192 | hsa-mir-5006 | 0.0541  | -0.0711 |
| 1193 | hsa-mir-5007 | 0.0914  | -0.0558 |
| 1194 | hsa-mir-5008 | 0.1326  | 0.0667  |
| 1195 | hsa-mir-5009 | 0.1375  | -0.0165 |
| 1196 | hsa-mir-5010 | -0.5857 | 0.105   |
| 1197 | hsa-mir-5011 | -0.0501 | 0.071   |
| 1198 | hsa-mir-5047 | -0.4332 | -0.1255 |
| 1199 | hsa-mir-5087 | -0.5636 | -0.2169 |
| 1200 | hsa-mir-5088 | 0.025   | -0.0476 |
| 1201 | hsa-mir-5089 | 0.0335  | -0.0165 |
| 1202 | hsa-mir-5090 | 0.248   | -0.1181 |
| 1203 | hsa-mir-5091 | -0.3543 | 0.071   |
| 1204 | hsa-mir-5092 | 0.185   | 0.0689  |
| 1205 | hsa-mir-5093 | 0.1453  | 0.0774  |
| 1206 | hsa-mir-5094 | 0.199   | 0.0185  |
| 1207 | hsa-mir-5100 | -0.1134 | -0.0348 |
| 1208 | hsa-mir-5186 | -0.7107 | -0.0337 |
| 1209 | hsa-mir-5187 | -0.0134 | 0.0817  |
| 1210 | hsa-mir-5188 | 0.239   | -0.0245 |
| 1211 | hsa-mir-5189 | 0.0801  | 0.0196  |
| 1212 | hsa-mir-5190 | 0.1265  | 0.2334  |
| 1213 | hsa-mir-5192 | 0.1332  | -0.0142 |
| 1214 | hsa-mir-5195 | 0.0354  | 0.0461  |
| 1215 | hsa-mir-5196 | -0.0591 | 0.133   |
| 1216 | hsa-mir-5197 | -0.1359 | 0.0373  |
| 1217 | hsa-mir-5571 | 0.0914  | 0.1484  |
| 1218 | hsa-mir-5572 | 0.1162  | 0.045   |
| 1219 | hsa-mir-5579 | 0.0092  | 0.2334  |
| 1220 | hsa-mir-5581 | 0.102   | 0.0667  |
| 1221 | hsa-mir-5582 | 0.0152  | -0.2094 |

---



---

|      |                 |         |         |
|------|-----------------|---------|---------|
| 1222 | hsa-mir-5584    | -0.1271 | -0.2113 |
| 1223 | hsa-mir-5587    | -0.0688 | -0.2011 |
| 1224 | hsa-mir-5588    | -0.0625 | -0.1457 |
| 1225 | hsa-mir-5589    | 0.1786  | -0.1841 |
| 1226 | hsa-mir-5680    | 0.1856  | -0.1071 |
| 1227 | hsa-mir-5681a   | -0.0074 | -0.073  |
| 1228 | hsa-mir-5681b   | -0.0941 | -0.153  |
| 1229 | hsa-mir-5682    | -0.1706 | -0.1518 |
| 1230 | hsa-mir-5683    | 0.0535  | -0.2561 |
| 1231 | hsa-mir-5684    | -0.0391 | -0.2854 |
| 1232 | hsa-mir-5685    | -0.0688 | -0.1475 |
| 1233 | hsa-mir-5686    | 0.1259  | -0.3181 |
| 1234 | hsa-mir-5687    | -0.194  | -0.1598 |
| 1235 | hsa-mir-5688    | 0.0662  | -0.1439 |
| 1236 | hsa-mir-5689    | -0.0094 | -0.0603 |
| 1237 | hsa-mir-5690    | 0.0361  | -0.1354 |
| 1238 | hsa-mir-5691    | 0.21    | -0.1137 |
| 1239 | hsa-mir-5692a-1 | 0.0605  | -0.1488 |
| 1240 | hsa-mir-5692b   | 0.038   | -0.087  |
| 1241 | hsa-mir-5693    | -0.0255 | -0.2962 |
| 1242 | hsa-mir-5694    | 0.0515  | -0.2049 |
| 1243 | hsa-mir-5695    | -0.0751 | -0.2319 |
| 1244 | hsa-mir-5696    | 0.0637  | -0.3354 |
| 1245 | hsa-mir-5697    | 0.1044  | -0.2216 |
| 1246 | hsa-mir-5698    | 0.1057  | -0.3445 |
| 1247 | hsa-mir-5700    | -0.7031 | -0.6241 |
| 1248 | hsa-mir-5701-1  | 0.0092  | -0.1457 |
| 1249 | hsa-mir-5701-2  | -0.1361 | -0.3501 |
| 1250 | hsa-mir-5702    | -0.2859 | -0.1293 |
| 1251 | hsa-mir-5703    | 0.0249  | -0.2469 |
| 1252 | hsa-mir-5704    | -0.5792 | -0.3023 |
| 1253 | hsa-mir-5705    | -0.9301 | -0.2901 |
| 1254 | hsa-mir-5706    | -0.266  | 0.0331  |
| 1255 | hsa-mir-5707    | -0.5704 | -0.6635 |

---

**Supplementary Table 2. Clinical characteristics of 14 CRC patients used in this study.**

| Characteristic               | Number | Percent of Total (%) |
|------------------------------|--------|----------------------|
| <b>Age</b>                   |        |                      |
| ≤60                          | 6      | 42.86                |
| >60                          | 8      | 57.14                |
| <b>Gender</b>                |        |                      |
| Male                         | 10     | 71.43                |
| Female                       | 4      | 28.57                |
| <b>Tumor differentiation</b> |        |                      |
| Poor                         | 5      | 35.71                |
| Median                       | 8      | 57.14                |
| Well                         | 1      | 7.14                 |
| <b>TNM stage</b>             |        |                      |
| I - II                       | 7      | 50                   |
| III-IV                       | 7      | 50                   |
| <b>KRAS mutations</b>        |        |                      |
| wild type                    | 7      | 50                   |
| G12 mutations                | 4      | 28.57                |
| G13 mutations                | 3      | 21.43                |

### Supplementary Table 3. Primers and shRNAs used in this study.

#### Primers

|                                      | Forward primer(5'-3')                | Reverse primer(5'-3')                                              |
|--------------------------------------|--------------------------------------|--------------------------------------------------------------------|
| <b>MiR-30a ChIP primers</b>          |                                      |                                                                    |
| Amplicon 1                           | CAGTGACTTGCTGAAGGAAGGG               | TCCTCCTTCCTACTTTGGCTGGC                                            |
| Amplicon 2                           | CTCTGCCCTGAAGGTGTAGC                 | ACCCACATACCTGATTGCC                                                |
| Amplicon 3                           | TGCTGTTGACAGTGAGCGAC                 | TCCGACTGAAAGCCCATCTG                                               |
| Amplicon 4                           | GGCCATGAGAGGTTTCATCA                 | ACCCAGAAAAACAGCCGAG                                                |
| <b>MiR-30a Cas9-knockout oligo</b>   |                                      |                                                                    |
| miR-30a-sgRNA-1#                     | CACCGCGACTGTAAACATCCTCGAC            | AAACGTCGAGGATGTTTACAGTCGC                                          |
| miR-30a-sgRNA-2#                     | CACCGGGCTTCACAGCTTCCAGTCG            | AAACCGACTGGAAGCTGTGAAGCCC                                          |
| <b>Genomic DNA sequencing primer</b> |                                      |                                                                    |
| miR-30a-knockout                     | ATCGTTGCCTGCACATCTTG                 | AAGTAGCCCCCTTGAAGTCCG                                              |
| KRAS mutation (Exon1)                | TCTTAAGCGTCGATGGAGGAG                | TTGAAACCAAGGTACATTTTCAG                                            |
| <b>RT-qPCR primer</b>                |                                      |                                                                    |
| miR-30a-3p                           | AGCCGCTTTCAGTCGGATGTTT               | GTGCAGGGTCCGAGGTAT                                                 |
| miR-30a-5p                           | GCGCGTGTAACATCCTCGACTGG              | GTGCAGGGTCCGAGGTAT                                                 |
| KRAS                                 | CCATTTCCGACTGGGAGCGAG                | TATTCAGTCATTTTCAGCAGGC                                             |
| ME1                                  | ACAGATAATATTTTCCCTCACT               | CTACTGGTCAACTTTGGT                                                 |
| $\beta$ -actin                       | ATCATGAAGTGTGACGTGGACAT              | AGGAGCAATGATCTTGATCTTCA                                            |
| GAPDH                                | CAAGGTCATCCATGACAACCTTTG             | GTCCACCACCCTGTGTCTGTAG                                             |
| <b>Primer for constructs</b>         |                                      |                                                                    |
| pHAGE-PURO -IRF8                     | ATAAGAATGCGGCCGCATGTGTGACCGAATGGTGG  | CCGCTCGAGGACGGTGATCTGTGGTTTTC                                      |
| pHAGE-GFP-miR-30a                    | CGCGGATCCTAATGACATCCATGAGCCTTCT      | CGCCTCGAGATACACAGAGCACCTCCTCA                                      |
| pHAGE-puro-ME1                       | CGCGCGGCCGCATGGAGCCGAAGCCCCCGT       | CTACTGGTCAACTTTGGTCT                                               |
| shRNA-#1-resistant ME1               | ACATATCGCCTCCGCTCTCAATGCATGGCCAGAA   | GACGGAGGCATATGCTCCTCGATCGTGGATAGTA                                 |
| pHAGE-puro-KRAS                      | CGCGGATCCATGACTGAATATAAACTTGTGG      | CGCGTCGACCTACATTATAATGCATTTTTTAATT                                 |
| pGL3-miR-30a-P1                      | CCGCTCGAGAGGGCGTTTCTTGGTTAGGG        | CCCAAGCTTAGTACTGGAGGGTGTGGGTTTCA                                   |
| pGL3-miR-30a-P1-Mut1                 | TGGGGTACAGAGTTACTTATTAGCCTGGAGGCTGGG | TAATAAGTAACTCTGTACCCCACTCCCATCCTGCTC                               |
| pGL3-miR-30a-P1-Mut2                 | CCCTCTACTCCAACCTCCCTGTAAAGAATGCCAGC  | AAGGGAGTTGGAGTATAGAGGGTCAGGGCATCCAG                                |
| pGL3-miR-30a-P2                      | CCGCTCGAGTTGAAACCCACACCTTCCAG        | GGAAGATCTGGTTTGAAGCAGCCCGAGA                                       |
| pGL3-miR-30a-P3                      | CCGCTCGAGGCTACCCTGGACACTAAGCC        | CCCAAGCTTGTGACAGGTCCCCTACTTGC                                      |
| pGL3-miR-30a-P4                      | CCGCTCGAGCAAGGCAAGTAGGGGACCTG        | CCCAAGCTTAAGTAGCCCTTGAAGTCCG                                       |
| pGL3-KRAS-UTR-B1                     | CGCTCTAGAGGCTTTTGGTGCATGCAGTT        | CGCGTCGACCAGGAAAAGCTATTAGGAGTCT                                    |
| pGL3-KRAS-UTR-B1-mut                 | GGTTTTTGCAGCGTCATTGAGGGAACACAAATTT   | CTCAATGACGCTGCAAAAACCAATTAGAAGGTCT                                 |
| pGL3-KRAS-UTR-B2                     | CGCTCTAGAAGGCCTTTGGTATACGACCC        | CGCGTCGACCTGCAGTTCCTGAAGTATGG                                      |
| pGL3-KRAS-UTR-B3                     | CGCTCTAGAACAGAGCTAACTGGGTTACA        | CGCGTCGACATTCATATCCATTTCCGGGG                                      |
| pGL3-ME1-UTR-B1                      | CGCTCTAGACTACGGAGAACTCATCATT         | CGCGTCGACCTTTAAGAGGTCAGTTCCCTC                                     |
| pGL3-ME1-UTR-B2                      | CGCTCTAGAGAGTAGTTATATGCCAGACTG       | CGCGTCGACCAATTCACCTTTTCTATGC                                       |
| pGL3-ME1-UTR-B2-mut                  | CGCTCTAGAGAGTAGTTATATGCCAGACTG       | CGCGTCGACCAATTCACCTTTTCTATGCTTTAATA<br>AATCTTTTGCATAGATGCGCTCAITTA |

## shRNA sequences

| Gene      | siRNA sequences (5'-3') |
|-----------|-------------------------|
| shKRAS-#1 | CCTATGGTCCTAGTAGGAAAT   |
| shKRAS-#2 | GAGGGCTTTCTTTGTGTAATT   |
| shME1-#1  | GGGCATATTGCTTCAGTTC     |
| shME1-#2  | GCCTTCAATGAACGGCCTATT   |
